# Supplementary material for: Childhood Body Composition Trajectories and Adolescent Lung Function. Findings from the ALSPAC study
Source: PubMed Central journal article supplement — Am J Respir Crit Care Med. 2019 Jul 1;200(1):75–83. doi: 10.1164/rccm.201806-1168OC (PMC6811931; doi:10.1164/rccm.201806-1168oc), 2019-07-01
Supplement: rccm.201806-1168OC_peralta_data_supplement.pdf [file rccm.201806-1168OC_peralta_data_supplement.pdf]

**Childhood body composition trajectories and adolescent lung function: Findings from  
the ALSPAC study**

Gabriela P. Peralta<sup>1,2,3</sup>, Elaine Fuertes<sup>1,2,3</sup>, Raquel Granell<sup>4</sup>, Osama Mahmoud<sup>4</sup>, Céline Roda<sup>1,2,3</sup>, Ignasi Serra<sup>1,2,3</sup>, Deborah Jarvis<sup>5,6</sup>, John Henderson<sup>4</sup>, Judith Garcia-Aymerich<sup>1,2,3</sup>

**ONLINE SUPPLEMENT**

**Contents**

**Study population**

**Body weight and composition**

**Lung function**

**Other variables**

**Identification of body weight and composition trajectories**

**Analysis of the associations between body weight and composition trajectories and post-bronchodilation lung function at 15 years**

**Figure E1.** Flowchart of study participants

**Table E1.** Characteristics of the children included and excluded from the analysis identifying the body weight and composition trajectories

**Table E2.** Characteristics of the children included and excluded from the analysis examining associations of body weight and composition trajectories with post-bronchodilation lung function measures at 15 years

**Table E3.** Distribution of BMI according to BMI trajectory

**Table E4.** Distribution of LBMI according to LBMI trajectory

**Table E5.** Distribution of FMI according to FMI trajectory

**Table E6.** Adjusted associations of body weight and composition trajectories with post-bronchodilation lung function measures at age 15 years

**Table E7.** Adjusted associations of body weight and composition trajectories with lung function growth rates from age 8 to 15 years

**Table E8.** Adjusted associations of body weight and composition trajectories with post-bronchodilation lung function measures at age 15 years: Models additionally adjusted for wear-time spent in MVPA and total energy intake

**Table E9.** Adjusted associations of body weight and composition trajectories with post-bronchodilation lung function measures at age 15 years: Excluding children with lifetime doctor-diagnosed asthma

**Table E10.** Adjusted associations of body weight and composition trajectories with post-bronchodilation lung function measures at age 15 years: Excluding children with extreme lung function measures (<p1 and p>99) at age 15 years

**Table E11.** Adjusted associations of body weight and composition trajectories with pre-bronchodilation lung function measures at age 15 years

**Table E12.** Adjusted associations of body weight and composition trajectories with post-bronchodilation lung function measures at age 15 years: Without adjustment for lung function at 8 years

**Table E13.** Adjusted associations of body weight and composition trajectories with post-bronchodilation lung function measures at age 15 years: Using lung function measures as standard deviation scores derived using the Global Lung Initiative equations

**Table E14.** Adjusted associations of body weight and composition trajectories with lung function growth rates from age 8 to 15 years: Models additionally adjusted for wear-time spent in MVPA and total energy intake

**Table E15.** Adjusted associations of body weight and composition trajectories with lung function growth rates from age 8 to 15 years: Excluding children with lifetime doctor-diagnosed asthma

**Table E16.** Adjusted associations of body weight and composition trajectories with lung function growth rates from age 8 to 15 years: Excluding children with extreme lung function measures (<p1 and p>99) at age 15 years

**Table E17.** Adjusted associations of body weight and composition trajectories with lung function growth rates from age 8 to 15 years: Without adjustment for lung function at 8 years

**Table E18.** Adjusted associations of body weight and composition trajectories with lung function growth rates from age 8 to 15 years: Using lung function measures as standard deviation scores derived using the Global Lung Initiative equation

## References

## **Study population**

ALSPAC recruited 14,541 pregnant women residents in Avon, UK, with expected dates of delivery between the 1st of April, 1991, and the 31st of December 1992. 14,541 is the *initial* number of pregnancies for which the mother enrolled in the ALSPAC study and had either returned at least one questionnaire or attended a “Children in Focus” clinic by 19/07/99. Of these *initial* pregnancies, there was a total of 14,676 fetuses, resulting in 14,062 live births and 13,988 children who were alive at 1 year of age.

When the oldest children were approximately 7 years of age, an attempt was made to bolster the initial sample with eligible cases who had failed to join the study originally. As a result, when considering variables collected from the age of seven onwards (and potentially abstracted from obstetric notes) there are data available for more than the 14,541 pregnancies mentioned above. The number of new pregnancies not in the initial sample (known as Phase I enrolment) that are currently represented on the built files and reflecting enrolment status at the age of 18 is 706 (452 and 254 recruited during Phases II and III respectively), resulting in an additional 713 children being enrolled. The phases of enrolment are described in more detail in the cohort profile paper (E1, E2).

The total sample size for analyses using any data collected after the age of seven is therefore 15,247 pregnancies, resulting in 15,458 fetuses. Of this total sample of 15,458 fetuses, 14,775 were live births and 14,701 (including 14,305 singleton births) were alive at 1 year of age.

The study website contains details of all the data that are available through a fully searchable data dictionary at [www.bris.ac.uk/alspac/researchers/data-access/data-dictionary/](http://www.bris.ac.uk/alspac/researchers/data-access/data-dictionary/).

The ALSPAC Ethics and Law Committee and the Local Research Ethics Committees gave ethical approval. A list of the Research Ethics Committee approval references for each of the visits can be found at <http://www.bristol.ac.uk/media-library/sites/alspac/documents/governance/Research%20Ethics%20Committee%20approval%20references.pdf>. All participants and their parents/guardians provided written informed consent.

## **Body weight and composition**

From age 7 to 15 years, weight and height were measured at annual clinic visits. Standing height was measured to 0.1 cm using the Harpenden Stadiometer (Holtain, Crymych, Pembrokeshire, UK) with shoes and socks removed. Weight was measured to 0.1 kg using the Tanita THF 300GS body fat analyser (Tanita UK Ltd, Yewsey, Middlesex, UK), with clothes largely removed. BMI was calculated by dividing weight (kg) by height (m) squared.

Body composition was measured at the clinic visits at age 9, 11, 13, and 15 years. Total lean body mass, total fat mass, and total bone mass were derived using a Lunar Prodigy DXA scanner (GE Medical Systems Lunar, Madison, WI, USA) following standardized procedures previously described (E3). We calculated a lean body mass index (LBMI) and a fat mass index (FMI) by dividing total lean body mass and total fat mass by height squared, respectively.

### **Lung function**

Lung function was measured by spirometry at 8 and 15 years (Vitalograph 2120; Vitalograph, Maids Moreton, United Kingdom) according to American Thoracic Society standards (E4), as previously reported (E5). At 15 years, lung function was measured before and after bronchodilation with salbutamol (inhalation of a standard dose of 400 µg) (E6). All flow-volume curves were inspected post-hoc to ensure that acceptability criteria were met. Results were obtained from the best of three technically acceptable flow-volume curves repeatable within 200 mL of forced vital capacity (FVC), according to the criteria at that time. The parameters FVC, forced expiratory volume in 1 s (FEV<sub>1</sub>), and forced expiratory flow at 25 and 75% of FVC (FEF<sub>25-75</sub>) were obtained and the FEV<sub>1</sub>/FVC ratio was calculated. The outcomes of the analysis were: post-bronchodilation lung function measures at 15 years and rate of lung function growth from age 8 to 15 years (calculated as (pre-bronchodilation lung function at 15 years – pre-bronchodilation lung function at 8 years)/time of follow-up in years).

### **Other variables**

We collected information on sociodemographic and lifestyle factors at different time points to describe the sample or as potential confounding variables from diverse sources at different time points. At 32 weeks of gestation, the mother recorded her occupation using a self-completed questionnaire, which was used to allocate her to a social class (professional and intermediate, skilled non-manual, skilled manual, partly skilled, and unskilled manual workers) based on the 1991 Office of Population, Censuses and Surveys classifications. Smoking during pregnancy was assessed at 18 and 32 weeks of gestation using self-completed questionnaires and a dichotomous variable was created for any smoking during pregnancy. Birthweight, gestational age and sex were obtained from birth records. Information about breastfeeding was obtained at age 15 months from maternal self-completed questionnaires. Environmental tobacco exposure at age 3 years was recorded by the mother

using a self-completed questionnaire. From the 7 years questionnaire, we obtained data on total energy intake of the child based on a 3-day report. At 11 years, physical activity was measured by accelerometer (Actigraph LLC, Fort Walton Beach, FL, USA) and the wear-time spent in moderate to vigorous physical activity (MVPA) (E7) was obtained. Smoking habits at age 14 years were reported by the children themselves using a self-completed questionnaire. At 15 years, children reported if a doctor had ever diagnosed them with asthma. Finally, pubertal status (age at menarche for girls and state of voice break for boys at 15 years) was obtained from a puberty questionnaire completed by the parents or/and children from age 8 to 15 years. We used the first reported age at onset of menarche, as this report should be least affected by recall bias.

### **Identification of body weight and composition trajectories**

We identified BMI trajectories, using data at ages 7, 8, 9, 10, 11, 12, 13 and 15 years, as well as LBMI and FMI trajectories, using data at ages 9, 11, 13 and 15 years. As the distribution of BMI and FMI was right-skewed, we applied the natural log-transformation to all body weight and composition measures prior to the identification of the trajectories. The trajectories were defined by applying a Group-Based Trajectory Modeling approach (E8, E9) using the Stata plug-in *Traj* (E10). This approach has been previously used to identify anthropometric trajectories both in children (E11- E13) and adults (E14-E16).

Group-Based Trajectory Modeling, a specialized form of finite mixture modeling, uses the trajectory groups as a statistical device for approximating the unknown distribution of trajectories across population members employing a maximum likelihood approach (E9). The detailed steps of model selection have been previously described (E17). We computed a series of models with progressively more trajectory groups (from two to ten) and determined the most appropriate number of groups based on the Bayesian Information Criterion and the proportion of participants assigned to each trajectory (*a priori* defined to contain at least 5% of the sample). We first fitted the models assuming a cubic relationship and then tested quadratic or linear relationships for any non-significant polynomial term. We selected the final models according to model fit and plausibility of the observed trajectories according to previous research on distribution of body weight and composition in children and adolescents (E18, E19). Finally, individuals were assigned to one trajectory group based on the highest estimated group-membership probability. To further assess model adequacy, we ensured that: (i) we obtained, for each trajectory, a close correspondence between the estimated probability group membership and the proportion assigned to that group based on the posterior

probability of group membership; (ii) the average of the posterior probabilities of group membership for individuals assigned to each trajectory exceeded a minimum threshold of 0.7; and (iii) the odds of correct classification based on the posterior probabilities of group membership exceeded a minimum threshold of 5 (E8, E9). The assigned trajectory was used as the exposure variable (i.e., body weight or composition trajectory) in all subsequent analyses.

### **Analysis of the associations between body weight and composition trajectories and post-bronchodilation lung function at 15 years**

Associations of body weight and composition trajectories with post-bronchodilation lung function measures at age 15 years and lung function growth rates from age 8 to 15 years were examined using multivariable linear regression. We considered as potential confounders: (i) factors related to both the exposure and the outcome in bivariate analyses ( $p < 0.20$ ); (ii) factors that modified ( $>10\%$  change in regression coefficient) the estimate of the exposure variable; and (iii) factors deemed relevant in the scientific literature. The final multivariable models included adjustments for maternal social class, maternal smoking during pregnancy, birth weight, any breastfeeding, pubertal status as well as age and height at 15 years. We additionally adjusted all models for lung function levels at 8 years to reduce potential reverse causality. The models for the LBMI and FMI trajectories were also mutually adjusted.

We tested multicollinearity of the models using the variance inflation factor. The p-values for the trend test were obtained by treating the body weight and composition trajectories as continuous variables.

We conducted several sensitivity analyses: (i) additionally adjusting the models by wear-time spent in MVPA at 11 years and total energy intake at 7 years in the subsample with this information available; (ii) excluding children with any lifetime history of doctor-diagnosed asthma; (iii) excluding children with spirometry measures below the first percentile ( $<P_1$ ) or above the highest percentile ( $>P_{99}$ ); (iv) using pre-bronchodilation lung function measures at 15 years (only for the analysis of post-bronchodilation lung function levels at 15 years), (v) not adjusting the models for lung function at 8 years and (vi) using standard deviation scores (z-scores) derived using the Global Lung Initiative equations (E20) instead of absolute lung function values.

All analyses were conducted using Stata/SE 12.0 (StataCorp, College Station, TX, USA). Results are expressed as regression coefficients with 95% confidence intervals (95% CI).

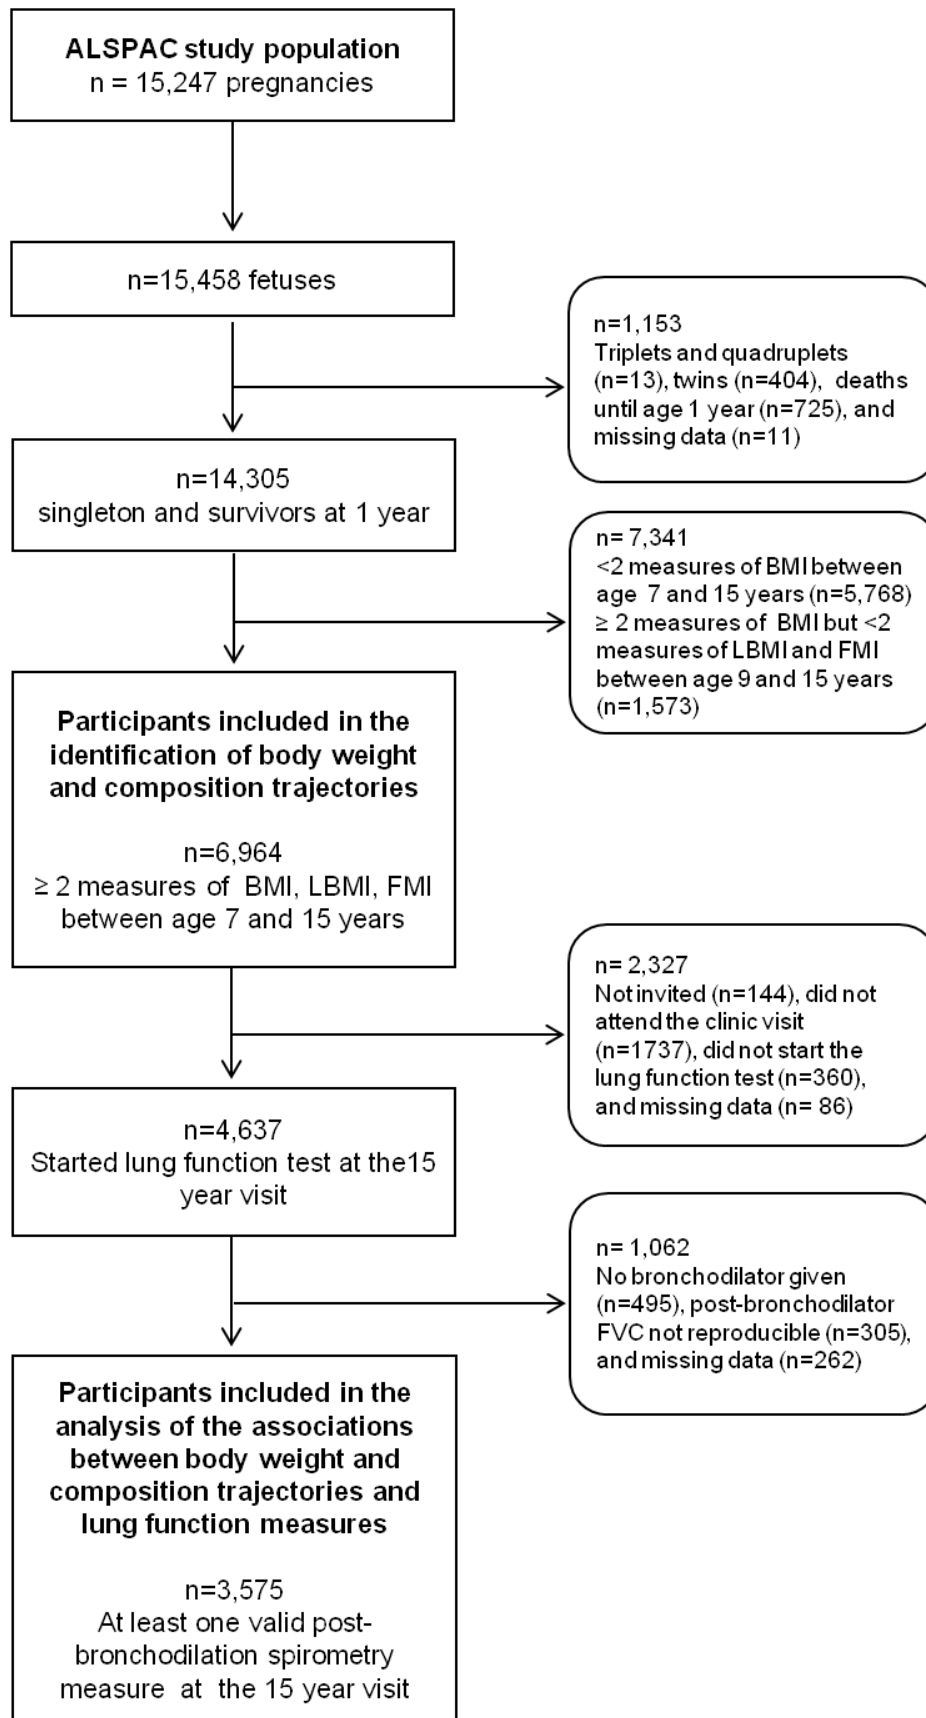

**Figure E1. Flow chart of study participants**

Definition of abbreviations: BMI, body mass index; FMI, fat mass index; FVC, forced vital capacity; LBMI, lean body mass index

**Table E1. Characteristics of the children included and excluded from the analysis identifying the body weight and composition trajectories**

| Median (P <sub>25</sub> -P <sub>75</sub> ) or n (%) | Included<br>(n=6,964) | Excluded<br>(n=7,341) | p-value           |
|-----------------------------------------------------|-----------------------|-----------------------|-------------------|
| <b>Mother characteristics</b>                       |                       |                       |                   |
| Maternal social class                               |                       |                       |                   |
| Professional and intermediate                       | 2,124 (40.1)          | 1,185 (29.3)          | <b>&lt;0.0001</b> |
| Skilled non-manual                                  | 2,214 (41.7)          | 1,750 (43.3)          |                   |
| Skilled manual, partly, and unskilled               | 962 (18.2)            | 1,107 (27.4)          |                   |
| Maternal smoking during pregnancy                   | 1,191 (18.9)          | 2,276 (38.9)          | <b>&lt;0.0001</b> |
| <b>Children characteristics</b>                     |                       |                       |                   |
| Sex. Girls                                          | 3,550 (51.0)          | 3,425 (46.7)          | <b>&lt;0.0001</b> |
| Gestation (weeks)                                   | 40 (39-41)            | 40 (39-41)            | 0.185             |
| Birth weight (Kg)                                   | 3.5 (3.1-3.8)         | 3.4 (3.1-3.7)         | <b>&lt;0.0001</b> |
| Ever breastfed                                      | 5,424 (84.6)          | 3,873 (68.9)          | <b>&lt;0.0001</b> |
| Spirometry measures at 8 years in boys              |                       |                       |                   |
| FVC (L)                                             | 2.0 (0.3)             | 2.0 (0.3)             | 0.766             |
| FEV <sub>1</sub> (L)                                | 1.7 (0.3)             | 1.7 (0.3)             | 0.933             |
| FEF <sub>25-75</sub> (L/s)                          | 2.0 (0.5)             | 2.0 (0.5)             | 0.536             |
| FEV <sub>1</sub> /FVC (%)                           | 87.5 (6.8)            | 87.3 (6.7)            | 0.653             |
| Spirometry measures at 8 years in girls             |                       |                       |                   |
| FVC (L)                                             | 1.8 (0.3)             | 1.9 (0.4)             | <b>0.010</b>      |
| FEV <sub>1</sub> (L)                                | 1.6 (0.3)             | 1.7 (0.3)             | <b>0.037</b>      |
| FEF <sub>25-75</sub> (L/s)                          | 2.1 (0.5)             | 2.1 (0.5)             | 0.755             |
| FEV <sub>1</sub> /FVC (%)                           | 89.4 (6.1)            | 89.0 (6.1)            | 0.128             |
| Body weight and composition at 9 years in boys      |                       |                       |                   |
| BMI (kg/m <sup>2</sup> )                            | 16.8 (15.6-18.7)      | 16.9 (15.7-19.1)      | 0.212             |
| LBMI (kg/m <sup>2</sup> )                           | 12.9 (12.4-13.5)      | 13.1 (12.5-13.7)      | <b>0.038</b>      |
| FMI (kg/m <sup>2</sup> )                            | 3.0 (2.1-4.7)         | 3.1 (2.1-5.1)         | 0.581             |
| Body weight and composition at 9 years in girls     |                       |                       |                   |
| BMI (kg/m <sup>2</sup> )                            | 17.3 (15.8-19.4)      | 17.5 (15.9-19.9)      | <b>0.008</b>      |
| LBMI (kg/m <sup>2</sup> )                           | 12.1 (11.5-12.7)      | 12.2 (11.5-12.8)      | 0.053             |
| FMI (kg/m <sup>2</sup> )                            | 4.4 (3.1-6.2)         | 4.6 (3.2-6.6)         | 0.059             |

Some variables had missing values in both the included children (1,664 for maternal social class, 648 for maternal smoking during pregnancy, 338 for gestation, 421 for birthweight and 553 for ever breastfed) and excluded children (3,299 for maternal social class, 1,489 for maternal smoking during pregnancy, 354 for gestation, 442 for birthweight and 1,722 for ever breastfed)

Definition of abbreviations: P<sub>25</sub>-P<sub>75</sub>, 25th and 75th percentiles  
p-value for the Chi-squared, Mann-Whitney, or Student's t-test  
Bold: p-value <0.05



**Table E2. Characteristics of the children included and excluded from the analysis examining associations of body weight and composition trajectories with post-bronchodilation lung function measures at 15 years**

| Median (P <sub>25</sub> -P <sub>75</sub> ) or n (%) | Included<br>(n=3,575) | Excluded<br>(n=3,389) | p-value           |
|-----------------------------------------------------|-----------------------|-----------------------|-------------------|
| <b>Mother characteristics</b>                       |                       |                       |                   |
| Maternal social class                               |                       |                       |                   |
| Professional and intermediate                       | 1,223 (43.5)          | 901 (36.2)            | <b>&lt;0.0001</b> |
| Skilled non-manual                                  | 1,114 (39.7)          | 1,100 (44.2)          |                   |
| Skilled manual, partly, and unskilled               | 473 (16.8)            | 489 (19.6)            |                   |
| Maternal smoking during pregnancy                   | 550 (16.8)            | 641 (21.1)            | <b>&lt;0.0001</b> |
| <b>Children characteristics</b>                     |                       |                       |                   |
| Sex. Girls                                          | 1,888 (52.8)          | 1,662 (49.0)          | <b>0.002</b>      |
| Gestation (weeks)                                   | 40 (39-41)            | 40 (39-41)            | 0.368             |
| Birth weight (grams)                                | 3460 (3140-3760)      | 3443 (3140-3760)      | 0.746             |
| Ever breastfed                                      | 2,906 (87.1)          | 2,518 (81.9)          | <b>&lt;0.0001</b> |
| Spirometry measures at 8 years in boys              |                       |                       |                   |
| FVC (L)                                             | 2.0 (0.3)             | 2.0 (0.3)             | 0.250             |
| FEV <sub>1</sub> (L)                                | 1.7 (0.3)             | 1.7 (0.3)             | 0.897             |
| FEF <sub>25-75</sub> (L/s)                          | 2.0 (0.5)             | 2.1 (0.5)             | 0.415             |
| FEV <sub>1</sub> /FVC (%)                           | 87.3 (6.8)            | 87.6 (6.8)            | 0.215             |
| Spirometry measures at 8 years in girls             |                       |                       |                   |
| FVC (L)                                             | 1.8 (0.3)             | 1.8 (0.3)             | 0.988             |
| FEV <sub>1</sub> (L)                                | 1.6 (0.3)             | 1.6 (0.3)             | 0.958             |
| FEF <sub>25-75</sub> (L/s)                          | 2.1 (0.5)             | 2.1 (0.5)             | 0.833             |
| FEV <sub>1</sub> /FVC (%)                           | 89.4 (6.0)            | 89.4 (6.1)            | 0.813             |
| BMI trajectories in boys                            |                       |                       |                   |
| Normal-low                                          | 562 (32.5)            | 537 (31.8)            | 0.922             |
| Normal-high                                         | 670 (38.8)            | 650 (38.5)            |                   |
| Overweight                                          | 347 (20.1)            | 354 (21.0)            |                   |
| Obese                                               | 148 (8.6)             | 146 (8.7)             |                   |
| BMI trajectories in girls                           |                       |                       |                   |
| Normal-low                                          | 435 (26.2)            | 490 (26.0)            | 0.871             |
| Normal-high                                         | 656 (39.5)            | 770 (40.8)            |                   |
| Overweight                                          | 432 (26.0)            | 475 (25.2)            |                   |
| Obese                                               | 139 (8.4)             | 153 (8.1)             |                   |
| LBMI trajectories in boys                           |                       |                       |                   |
| Low                                                 | 164 (9.5)             | 148 (8.8)             | 0.343             |
| Medium-low                                          | 668 (38.7)            | 625 (37.1)            |                   |
| Medium-high                                         | 685 (39.7)            | 678 (40.2)            |                   |
| High                                                | 210 (12.2)            | 236 (14.0)            |                   |
| LBMI trajectories in girls                          |                       |                       |                   |
| Low                                                 | 229 (13.8)            | 234 (12.4)            | 0.201             |
| Medium-low                                          | 664 (40.0)            | 728 (38.6)            |                   |
| Medium-high                                         | 583 (35.1)            | 725 (38.4)            |                   |
| High                                                | 186 (11.2)            | 201 (10.7)            |                   |
| FMI trajectories in boys                            |                       |                       |                   |
| Low                                                 | 416 (24.1)            | 406 (24.1)            | 0.850             |
| Medium-low                                          | 633 (36.7)            | 641 (38.0)            |                   |
| Medium-high                                         | 452 (26.2)            | 427 (25.3)            |                   |
| High                                                | 226 (13.1)            | 213 (12.6)            |                   |
| FMI trajectories in girls                           |                       |                       |                   |
| Low                                                 | 265 (15.9)            | 288 (15.3)            | 0.369             |
| Medium-low                                          | 564 (33.9)            | 664 (35.2)            |                   |
| Medium-high                                         | 536 (32.3)            | 634 (33.6)            |                   |
| High                                                | 297 (17.9)            | 302 (16.0)            |                   |

Some variables had missing values in both the included children (765 for maternal social class, 297 for maternal smoking during pregnancy, 150 for gestation, 194 for birthweight and 240 for ever breastfed) and excluded children (899 for maternal social class, 351 for maternal smoking during pregnancy, 188 for gestation, 227 for birthweight and 313 for ever breastfed)

Definition of abbreviations: BMI, body mass index; FMI, fat mass index; LBMI, lean body mass index; P<sub>25</sub>-P<sub>75</sub>, 25th and 75th percentiles

p-value for the Chi-squared, Mann-Whitney, or Student's t-test

Bold: p-value <0.05

**Table E3. Distribution of BMI according to BMI trajectory**

| BMI (Kg/m <sup>2</sup> )<br>Median (P <sub>25</sub> -P <sub>75</sub> ) | Boys                              |                                    |                                |                           | <i>p-value</i> | Girls                           |                                    |                                |                           | <i>p-value</i> |
|------------------------------------------------------------------------|-----------------------------------|------------------------------------|--------------------------------|---------------------------|----------------|---------------------------------|------------------------------------|--------------------------------|---------------------------|----------------|
|                                                                        | Normal-low<br>n= 1,099<br>(32.2%) | Normal-high<br>n= 1,320<br>(38.7%) | Overweight<br>n=701<br>(20.5%) | Obese<br>n= 294<br>(8.6%) |                | Normal-low<br>n= 925<br>(26.0%) | Normal-high<br>n= 1,426<br>(40.2%) | Overweight<br>n=907<br>(25.6%) | Obese<br>n= 292<br>(8.2%) |                |
| <b>7 years</b>                                                         | 14.6 (14.1-15.1)                  | 15.8 (15.4-16.4)                   | 17.2 (16.4-18.0)               | 20.1 (18.7-21.5)          | <b>0.0001</b>  | 14.4 (13.9-14.9)                | 15.8 (15.2-16.4)                   | 17.5 (16.7-18.4)               | 20.8 (19.4-22.4)          | <b>0.0001</b>  |
| <b>8 years</b>                                                         | 15.1 (14.7-15.6)                  | 16.6 (16.1-17.1)                   | 18.3 (17.6-19.3)               | 22.0 (20.6-23.4)          | <b>0.0001</b>  | 14.9 (14.4-15.4)                | 16.6 (16.0-17.2)                   | 18.9 (18.1-19.8)               | 22.6 (21.5-24.2)          | <b>0.0001</b>  |
| <b>9 years</b>                                                         | 15.2 (14.6-15.7)                  | 16.9 (16.4-17.5)                   | 19.4 (18.5-20.4)               | 23.4 (22.2-25.0)          | <b>0.0001</b>  | 15.0 (14.4-15.5)                | 17.0 (16.3-17.8)                   | 19.9 (18.9-21.1)               | 24.0 (22.7-25.7)          | <b>0.0001</b>  |
| <b>10 years</b>                                                        | 15.4 (14.9-15.9)                  | 17.4 (16.8-18.1)                   | 20.3 (19.4-21.4)               | 24.4 (23.2-26.1)          | <b>0.0001</b>  | 15.2 (14.7-15.8)                | 17.4 (16.7-18.3)                   | 20.7 (19.6-21.7)               | 25.1 (23.7-26.7)          | <b>0.0001</b>  |
| <b>11 years</b>                                                        | 15.9 (15.3-16.5)                  | 18.1 (17.5-19.0)                   | 21.4 (20.4-22.4)               | 25.9 (24.7-27.7)          | <b>0.0001</b>  | 15.8 (15.1-16.4)                | 18.3 (17.5-19.2)                   | 21.8 (20.7-23.1)               | 26.6 (25.2-28.4)          | <b>0.0001</b>  |
| <b>12 years</b>                                                        | 16.5 (15.8-17.1)                  | 18.8 (18.1-19.8)                   | 22.0 (20.9-23.3)               | 26.7 (25.1-28.6)          | <b>0.0001</b>  | 16.6 (15.8-17.3)                | 19.2 (18.3-20.2)                   | 22.6 (21.5-23.9)               | 27.6 (26.2-29.4)          | <b>0.0001</b>  |
| <b>13 years</b>                                                        | 17.1 (16.4-17.8)                  | 19.4 (18.6-20.2)                   | 22.4 (21.3-23.8)               | 27.1 (25.4-29.2)          | <b>0.0001</b>  | 17.3 (16.5-18.1)                | 19.8 (19-20.8)                     | 23.2 (21.9-24.5)               | 28.2 (26.6-30.3)          | <b>0.0001</b>  |
| <b>15 years</b>                                                        | 18.3 (17.5-19.0)                  | 20.5 (19.6-21.4)                   | 23.2 (22.0-24.7)               | 27.7 (25.5-30.3)          | <b>0.0001</b>  | 18.4 (17.5-19.4)                | 20.9 (20.0-22.0)                   | 23.9 (22.5-25.5)               | 29.4 (27.0-31.7)          | <b>0.0001</b>  |

Definition of abbreviations: BMI, body mass index; P<sub>25</sub>-P<sub>75</sub>, 25th and 75th percentiles

p-value for the Kruskal-Wallis test

Bold: p-value <0.05

**Table E4. Distribution of LBMI according to LBMI trajectory**

| LBMI (Kg/m <sup>2</sup> )<br>Median (P <sub>25</sub> -P <sub>75</sub> ) | Boys                   |                                 |                                  |                          |               | Girls                   |                                  |                                   |                          |               |
|-------------------------------------------------------------------------|------------------------|---------------------------------|----------------------------------|--------------------------|---------------|-------------------------|----------------------------------|-----------------------------------|--------------------------|---------------|
|                                                                         | Low<br>n=442<br>(9.1%) | Medium-low<br>n=1390<br>(37.9%) | Medium-high<br>n=1228<br>(39.9%) | High<br>n=354<br>(13.1%) | p-value       | Low<br>n=660<br>(13.0%) | Medium-low<br>n=1,507<br>(39.2%) | Medium-high<br>n=1,096<br>(36.9%) | High<br>n=287<br>(10.9%) | p-value       |
| <b>9 years</b>                                                          | 11.8 (11.4-12.0)       | 12.5 (12.2-12.9)                | 13.3 (12.9-13.7)                 | 14.2 (13.8-14.7)         | <b>0.0001</b> | 10.9 (10.7-11.2)        | 11.7 (11.4-12.0)                 | 12.5 (12.2-12.8)                  | 13.6 (13.2-14.0)         | <b>0.0001</b> |
| <b>11 years</b>                                                         | 11.8 (11.4-12.1)       | 12.7 (12.4-13.1)                | 13.7 (13.4-14.1)                 | 14.9 (14.6-15.5)         | <b>0.0001</b> | 11.2 (10.8-11.4)        | 12.2 (11.8-12.5)                 | 13.3 (12.9-13.7)                  | 14.6 (14.2-15.1)         | <b>0.0001</b> |
| <b>13 years</b>                                                         | 12.5 (12.2-13.0)       | 14.0 (13.5-14.5)                | 15.6 (15.0-16.1)                 | 17.3 (16.8-17.8)         | <b>0.0001</b> | 11.9 (11.6-12.1)        | 12.9 (12.6-13.2)                 | 13.9 (13.6-14.4)                  | 15.2 (14.8-15.7)         | <b>0.0001</b> |
| <b>15 years</b>                                                         | 13.9 (13.3-14.4)       | 15.4 (15-15.9)                  | 16.9 (16.4-17.4)                 | 18.5 (18.1-19.0)         | <b>0.0001</b> | 12.1 (11.8-12.4)        | 13.1 (12.8-13.5)                 | 14.2 (13.8-14.6)                  | 15.5 (14.9-16.0)         | <b>0.0001</b> |

Definition of abbreviations: LBMI, lean body mass index; P<sub>25</sub>-P<sub>75</sub>, 25th and 75th percentiles

p-value for the Kruskal-Wallis test

Bold: p-value <0.05

**Table E5. Distribution of FMI according to FMI trajectory**

| FMI (Kg/m <sup>2</sup> )<br>Median (P <sub>25</sub> -P <sub>75</sub> ) | Boys                    |                                  |                                 |                          |         | Girls                   |                                  |                                   |                          |         |
|------------------------------------------------------------------------|-------------------------|----------------------------------|---------------------------------|--------------------------|---------|-------------------------|----------------------------------|-----------------------------------|--------------------------|---------|
|                                                                        | Low<br>n=822<br>(24.1%) | Medium-low<br>n=1,274<br>(37.3%) | Medium-high<br>n=879<br>(25.7%) | High<br>n=439<br>(12.9%) | p-value | Low<br>n=553<br>(15.6%) | Medium-low<br>n=1,228<br>(34.6%) | Medium-high<br>n=1,170<br>(32.9%) | High<br>n=599<br>(16.9%) | p-value |
| <b>9 years</b>                                                         | 1.7 (1.4-2.0)           | 2.7 (2.3-3.2)                    | 4.5 (3.7-5.4)                   | 7.7 (6.5-9.3)            | 0.0001  | 2.3 (2.0-2.6)           | 3.5 (3.1-4.1)                    | 5.4 (4.7-6.2)                     | 8.5 (7.3-9.8)            | 0.0001  |
| <b>11 years</b>                                                        | 2.0 (1.7-2.3)           | 3.4 (2.9-4.0)                    | 5.8 (4.9-6.9)                   | 9.5 (8.1-11.0)           | 0.0001  | 2.6 (2.3-3.0)           | 4.0 (3.5-4.5)                    | 6.2 (5.4-7.2)                     | 9.8 (8.7-11.1)           | 0.0001  |
| <b>13 years</b>                                                        | 1.7 (1.4-2.0)           | 2.8 (2.3-3.3)                    | 5.2 (4.2-6.2)                   | 9.3 (8.0-11.0)           | 0.0001  | 3.1 (2.7-3.5)           | 4.7 (4.1-5.3)                    | 7.0 (6.1-7.8)                     | 10.5 (9.3-12.3)          | 0.0001  |
| <b>15 years</b>                                                        | 1.6 (1.3-1.8)           | 2.5 (2.1-3.0)                    | 4.4 (3.6-5.7)                   | 8.9 (7.3-11.0)           | 0.0001  | 3.8 (3.2-4.4)           | 5.5 (4.8-6.2)                    | 7.5 (6.7-8.5)                     | 11.4 (10.0-13.6)         | 0.0001  |

Definition of abbreviations: FMI, fat mass index; P<sub>25</sub>-P<sub>75</sub>, 25th and 75th percentiles

p-value for the Kruskal-Wallis test

Bold: p-value <0.05

**Table E6. Adjusted associations of body weight and composition trajectories with post-bronchodilation lung function measures at age 15 years**

|              |             | FVC (L)                   |                   | FEV <sub>1</sub> (L)      |                   | FEF <sub>25-75</sub> (L/s) |                   | FEV <sub>1</sub> /FVC (%) |                   |
|--------------|-------------|---------------------------|-------------------|---------------------------|-------------------|----------------------------|-------------------|---------------------------|-------------------|
|              |             | Adjusted $\beta$ [95% CI] | p-value           | Adjusted $\beta$ [95% CI] | p-value           | Adjusted $\beta$ [95% CI]  | p-value           | Adjusted $\beta$ [95% CI] | p-value           |
| <b>BOYS</b>  |             |                           |                   |                           |                   |                            |                   |                           |                   |
| BMI          | Normal-low  | (Reference)               |                   | (Reference)               |                   | (Reference)                |                   | (Reference)               |                   |
|              | Normal-high | 0.11 [0.02; 0.21]         | <b>0.017</b>      | 0.11 [0.03; 0.2]          | <b>0.008</b>      | 0.16 [0.03; 0.30]          | <b>0.019</b>      | -0.05 [-0.89; 0.79]       | 0.910             |
|              | Overweight  | 0.15 [0.04; 0.27]         | <b>0.007</b>      | 0.12 [0.02; 0.22]         | <b>0.018</b>      | 0.14 [-0.03; 0.30]         | <b>0.099</b>      | -0.84 [-1.83; 0.16]       | 0.100             |
|              | Obese       | 0.11 [-0.05; 0.27]        | 0.161             | 0.01 [-0.13; 0.15]        | 0.854             | -0.13 [-0.36; 0.10]        | 0.261             | -1.82 [-3.22; -0.42]      | <b>0.011</b>      |
|              |             | <i>p-trend</i>            | <b>0.014</b>      | <i>p-trend</i>            | 0.165             | <i>p-trend</i>             | 0.890             | <i>p-trend</i>            | <b>0.007</b>      |
| LBMI         | Low         | (Reference)               |                   | (Reference)               |                   | (Reference)                |                   | (Reference)               |                   |
|              | Medium-low  | 0.24 [0.09; 0.39]         | <b>0.001</b>      | 0.22 [0.08; 0.35]         | <b>0.002</b>      | 0.24 [0.01; 0.46]          | <b>0.039</b>      | -0.46 [-1.86; 0.94]       | 0.516             |
|              | Medium-high | 0.44 [0.29; 0.59]         | <b>&lt;0.0001</b> | 0.40 [0.26; 0.54]         | <b>&lt;0.0001</b> | 0.43 [0.21; 0.66]          | <b>&lt;0.0001</b> | -0.42 [-1.83; 0.99]       | 0.560             |
|              | High        | 0.62 [0.44; 0.79]         | <b>&lt;0.0001</b> | 0.53 [0.38; 0.69]         | <b>&lt;0.0001</b> | 0.53 [0.27; 0.80]          | <b>&lt;0.0001</b> | -0.79 [-2.42; 0.83]       | 0.339             |
|              |             | <i>p-trend</i>            | <b>&lt;0.0001</b> | <i>p-trend</i>            | <b>&lt;0.0001</b> | <i>p-trend</i>             | <b>&lt;0.0001</b> | <i>p-trend</i>            | 0.408             |
| FMI          | Low         | (Reference)               |                   | (Reference)               |                   | (Reference)                |                   | (Reference)               |                   |
|              | Medium-low  | 0.04 [-0.06; 0.13]        | 0.440             | 0.07 [-0.01; 0.16]        | 0.102             | 0.18 [0.04; 0.32]          | <b>0.014</b>      | 0.77 [-0.12; 1.66]        | 0.089             |
|              | Medium-high | 0.02 [-0.09; 0.12]        | 0.743             | -0.01 [-0.11; 0.09]       | 0.854             | -0.03 [-0.19; 0.13]        | 0.710             | -0.80 [-1.79; 0.19]       | 0.111             |
|              | High        | -0.09 [-0.22; 0.05]       | 0.210             | -0.14 [-0.26; -0.01]      | <b>0.032</b>      | -0.20 [-0.4; 0.01]         | 0.059             | -1.44 [-2.70; -0.18]      | <b>0.025</b>      |
|              |             | <i>p-trend</i>            | 0.355             | <i>p-trend</i>            | <b>0.035</b>      | <i>p-trend</i>             | <b>0.028</b>      | <i>p-trend</i>            | <b>0.003</b>      |
| <b>GIRLS</b> |             |                           |                   |                           |                   |                            |                   |                           |                   |
| BMI          | Normal-low  | (Reference)               |                   | (Reference)               |                   | (Reference)                |                   | (Reference)               |                   |
|              | Normal-high | 0.08 [0.01; 0.16]         | <b>0.026</b>      | 0.06 [-0.01; 0.13]        | 0.107             | 0.11 [-0.02; 0.24]         | 0.098             | -0.84 [-1.78; 0.10]       | 0.080             |
|              | Overweight  | 0.12 [0.03; 0.21]         | <b>0.007</b>      | 0.08 [-0.01; 0.17]        | 0.071             | 0.09 [-0.07; 0.24]         | 0.277             | -1.60 [-2.70; -0.50]      | <b>0.004</b>      |
|              | Obese       | 0.22 [0.09; 0.35]         | <b>0.001</b>      | 0.12 [0.00; 0.25]         | 0.060             | 0.08 [-0.15; 0.31]         | 0.488             | -2.85 [-4.47; -1.23]      | <b>0.001</b>      |
|              |             | <i>p-trend</i>            | <b>&lt;0.0001</b> | <i>p-trend</i>            | <b>0.033</b>      | <i>p-trend</i>             | 0.349             | <i>p-trend</i>            | <b>&lt;0.0001</b> |
| LBMI         | Low         | (Reference)               |                   | (Reference)               |                   | (Reference)                |                   | (Reference)               |                   |
|              | Medium-low  | 0.17 [0.08; 0.27]         | <b>&lt;0.0001</b> | 0.18 [0.09; 0.28]         | <b>&lt;0.0001</b> | 0.29 [0.12; 0.46]          | <b>0.001</b>      | 0.53 [-0.68; 1.75]        | 0.388             |
|              | Medium-high | 0.28 [0.18; 0.38]         | <b>&lt;0.0001</b> | 0.28 [0.18; 0.38]         | <b>&lt;0.0001</b> | 0.38 [0.2; 0.55]           | <b>&lt;0.0001</b> | 0.09 [-1.16; 1.34]        | 0.884             |
|              | High        | 0.37 [0.23; 0.50]         | <b>&lt;0.0001</b> | 0.30 [0.17; 0.43]         | <b>&lt;0.0001</b> | 0.35 [0.12; 0.58]          | <b>0.003</b>      | -1.13 [-2.76; 0.51]       | 0.176             |
|              |             | <i>p-trend</i>            | <b>&lt;0.0001</b> | <i>p-trend</i>            | <b>&lt;0.0001</b> | <i>p-trend</i>             | <b>0.001</b>      | <i>p-trend</i>            | 0.140             |
| FMI          | Low         | (Reference)               |                   | (Reference)               |                   | (Reference)                |                   | (Reference)               |                   |
|              | Medium-low  | 0.02 [-0.07; 0.11]        | 0.704             | 0.01 [-0.08; 0.09]        | 0.898             | 0.10 [-0.06; 0.26]         | 0.218             | -0.68 [-1.81; 0.45]       | 0.236             |
|              | Medium-high | 0.03 [-0.06; 0.12]        | 0.525             | 0.00 [-0.09; 0.09]        | 0.934             | 0.03 [-0.13; 0.19]         | 0.730             | -1.25 [-2.41; -0.08]      | <b>0.036</b>      |
|              | High        | 0.09 [-0.03; 0.20]        | 0.141             | 0.02 [-0.09; 0.13]        | 0.718             | 0.03 [-0.18; 0.23]         | 0.793             | -2.05 [-3.49; -0.6]       | <b>0.005</b>      |
|              |             | <i>p-trend</i>            | 0.189             | <i>p-trend</i>            | 0.921             | <i>p-trend</i>             | 0.684             | <i>p-trend</i>            | <b>0.002</b>      |

Definition of abbreviations: BMI, body mass index; FEF<sub>25-75</sub> forced expiratory flow at 25-75%; FEV<sub>1</sub>, volume expired in the first second; FMI, fat mass index; FVC, forced vital capacity; LBMI, lean body mass index; 95% CI, 95% confidence intervals;  $\beta$ , estimate of regression coefficient. Models are adjusted for maternal social class, maternal smoking during pregnancy, birth weight, breastfeeding, lung function measures at 8 years, pubertal status (age at menarche for girls and voice break status at age 15 years for boys), as well as age and height at 15 years. Models for FMI and LBMI are also mutually adjusted. Bold: p-value <0.05

**Table E7. Adjusted associations of body weight and composition trajectories with pre-bronchodilation lung function growth rates from age 8 to 15 years**

|              |             | FVC change (mL/year)      |                   | FEV <sub>1</sub> change (mL/year) |                   | FEF <sub>25-75</sub> change (mL/s·year) |                   |                   |
|--------------|-------------|---------------------------|-------------------|-----------------------------------|-------------------|-----------------------------------------|-------------------|-------------------|
|              |             | Adjusted $\beta$ [95% CI] | p-value           | Adjusted $\beta$ [95% CI]         | p-value           | Adjusted $\beta$ [95% CI]               | p-value           |                   |
| <b>BOYS</b>  |             |                           |                   |                                   |                   |                                         |                   |                   |
| BMI          | Normal-low  | (Reference)               |                   | (Reference)                       |                   | (Reference)                             |                   |                   |
|              | Normal-high | 23.3 [9.7; 36.8]          | <b>0.001</b>      | 21.5 [9.6; 33.4]                  | <b>&lt;0.0001</b> | 24.1 [5.2; 43.0]                        | <b>0.012</b>      |                   |
|              | Overweight  | 27.4 [11.2; 43.5]         | <b>0.001</b>      | 20.3 [6.1; 34.5]                  | <b>0.005</b>      | 18.5 [-3.9; 40.9]                       | 0.105             |                   |
|              | Obese       | 15.2 [-7.8; 38.1]         | 0.195             | -0.6 [-20.6; 19.3]                | 0.952             | -14.8 [-46.5; 16.9]                     | 0.360             |                   |
|              |             | <i>p-trend</i>            | <b>0.007</b>      |                                   | <i>p-trend</i>    | 0.148                                   | <i>p-trend</i>    | 0.802             |
| LBMI         | Low         | (Reference)               |                   | (Reference)                       |                   | (Reference)                             |                   |                   |
|              | Medium-low  | 33.3 [11.8; 54.8]         | <b>0.002</b>      | 30.3 [11.2; 49.4]                 | <b>0.002</b>      | 31.2 [0.5; 62.0]                        | <b>0.047</b>      |                   |
|              | Medium-high | 67.2 [45.6; 88.9]         | <b>&lt;0.0001</b> | 58.7 [39.4; 77.9]                 | <b>&lt;0.0001</b> | 54.0 [23.1; 84.9]                       | <b>0.001</b>      |                   |
|              | High        | 90.3 [65.0; 115.7]        | <b>&lt;0.0001</b> | 75.6 [53.2; 98.0]                 | <b>&lt;0.0001</b> | 68.3 [32.3; 104.4]                      | <b>&lt;0.0001</b> |                   |
|              |             | <i>p-trend</i>            | <b>&lt;0.0001</b> |                                   | <i>p-trend</i>    | <b>&lt;0.0001</b>                       | <i>p-trend</i>    | <b>&lt;0.0001</b> |
| FMI          | Low         | (Reference)               |                   | (Reference)                       |                   | (Reference)                             |                   |                   |
|              | Medium-low  | 7.2 [-6.7; 21.1]          | 0.310             | 9.8 [-2.4; 22.1]                  | 0.114             | 19.8 [-0.1; 39.7]                       | 0.051             |                   |
|              | Medium-high | 4.2 [-11.3; 19.6]         | 0.597             | -1.5 [-15.1; 12.1]                | 0.828             | -5.0 [-27.0; 17.1]                      | 0.659             |                   |
|              | High        | -14.6 [-34.5; 5.3]        | 0.151             | -23.2 [-40.7; -5.8]               | <b>0.009</b>      | -25.0 [-53.3; 3.3]                      | 0.084             |                   |
|              |             | <i>p-trend</i>            | 0.315             |                                   | <i>p-trend</i>    | <b>0.015</b>                            | <i>p-trend</i>    | <b>0.045</b>      |
| <b>GIRLS</b> |             |                           |                   |                                   |                   |                                         |                   |                   |
| BMI          | Normal-low  | (Reference)               |                   | (Reference)                       |                   | (Reference)                             |                   |                   |
|              | Normal-high | 7.6 [-2.9; 18.1]          | 0.155             | 4.0 [-5.8; 13.8]                  | 0.426             | -0.4 [-17.4; 16.5]                      | 0.960             |                   |
|              | Overweight  | 17.3 [4.9; 29.7]          | <b>0.006</b>      | 7.8 [-3.8; 19.3]                  | 0.186             | -2.3 [-22.2; 17.5]                      | 0.818             |                   |
|              | Obese       | 28.0 [9.4; 46.6]          | <b>0.003</b>      | 8.8 [-8.4; 26.0]                  | 0.315             | -4.7 [-34.4; 25.0]                      | 0.756             |                   |
|              |             | <i>p-trend</i>            | <b>0.001</b>      |                                   | <i>p-trend</i>    | 0.165                                   | <i>p-trend</i>    | 0.734             |
| LBMI         | Low         | (Reference)               |                   | (Reference)                       |                   | (Reference)                             |                   |                   |
|              | Medium-low  | 25.9 [12.6; 39.2]         | <b>&lt;0.0001</b> | 23.6 [11; 36.2]                   | <b>&lt;0.0001</b> | 31.2 [9.3; 53.1]                        | <b>0.005</b>      |                   |
|              | Medium-high | 43.0 [28.9; 57.0]         | <b>&lt;0.0001</b> | 35.7 [22.5; 48.9]                 | <b>&lt;0.0001</b> | 37.8 [15.1; 60.5]                       | <b>0.001</b>      |                   |
|              | High        | 55.8 [37.1; 74.5]         | <b>&lt;0.0001</b> | 41.9 [24.3; 59.4]                 | <b>&lt;0.0001</b> | 47.5 [17.2; 77.8]                       | <b>0.002</b>      |                   |
|              |             | <i>p-trend</i>            | <b>&lt;0.0001</b> |                                   | <i>p-trend</i>    | <b>&lt;0.0001</b>                       | <i>p-trend</i>    | <b>0.002</b>      |
| FMI          | Low         | (Reference)               |                   | (Reference)                       |                   | (Reference)                             |                   |                   |
|              | Medium-low  | -2.8 [-15.1; 9.5]         | 0.655             | -3.3 [-14.9; 8.2]                 | 0.574             | -3.8 [-24.1; 16.5]                      | 0.716             |                   |
|              | Medium-high | 0.3 [-12.5; 13.2]         | 0.959             | -3.5 [-15.5; 8.5]                 | 0.563             | -9.7 [-30.8; 11.5]                      | 0.370             |                   |
|              | High        | 4.9 [-11.1; 20.8]         | 0.550             | -5.7 [-20.5; 9.2]                 | 0.456             | -17.7 [-43.9; 8.6]                      | 0.187             |                   |
|              |             | <i>p-trend</i>            | 0.516             |                                   | <i>p-trend</i>    | 0.403                                   | <i>p-trend</i>    | 0.117             |

Rate of lung function growth for each parameter was calculated as: (pre-bronchodilation lung function measure at 15 years - pre-bronchodilation lung function measure at 8 years)/time follow-up. Definition of abbreviations: BMI, body mass index; FEF<sub>25-75</sub> forced expiratory flow at 25-75%; FEV<sub>1</sub>, volume expired in the first second; FMI, fat mass index; FVC, forced vital capacity; LBMI, lean body mass index; 95% CI, 95% confidence intervals;  $\beta$ , estimate of regression coefficient. Models are adjusted for maternal social class, maternal smoking during pregnancy, birth weight, breastfeeding, lung function measures at 8 years, pubertal status (age at menarche for girls and voice break status at age 15 years for boys), as well as age and height at 15 years. Models for FMI and LBMI are also mutually adjusted. Bold: p-value <0.05

**Table E8. Adjusted associations of body weight and composition trajectories with post-bronchodilation lung function measures at age 15 years: Models additionally adjusted for wear-time spent in MVPA and total energy intake**

|              |             | FVC (L)                   |                   | FEV <sub>1</sub> (L)      |                   | FEF <sub>25-75</sub> (L/s) |                   | FEV <sub>1</sub> /FVC (%) |              |
|--------------|-------------|---------------------------|-------------------|---------------------------|-------------------|----------------------------|-------------------|---------------------------|--------------|
|              |             | Adjusted $\beta$ [95% CI] | p-value           | Adjusted $\beta$ [95% CI] | p-value           | Adjusted $\beta$ [95% CI]  | p-value           | Adjusted $\beta$ [95% CI] | p-value      |
| <b>BOYS</b>  |             |                           |                   |                           |                   |                            |                   |                           |              |
| BMI          | Normal-low  | (Reference)               |                   | (Reference)               |                   | (Reference)                |                   | (Reference)               |              |
|              | Normal-high | 0.17 [0.06; 0.27]         | <b>0.003</b>      | 0.15 [0.05; 0.25]         | <b>0.003</b>      | 0.20 [0.04; 0.36]          | <b>0.015</b>      | -0.17 [-1.14; 0.81]       | 0.733        |
|              | Overweight  | 0.21 [0.07; 0.34]         | <b>0.002</b>      | 0.16 [0.04; 0.28]         | <b>0.011</b>      | 0.17 [-0.03; 0.36]         | <b>0.092</b>      | -0.69 [-1.87; 0.50]       | 0.257        |
|              | Obese       | 0.19 [-0.01; 0.39]        | 0.067             | 0.09 [-0.09; 0.27]        | 0.334             | -0.05 [-0.34; 0.24]        | 0.738             | -1.44 [-3.23; 0.34]       | 0.112        |
|              |             | <i>p-trend</i>            | <b>0.003</b>      | <i>p-trend</i>            | <b>0.035</b>      | <i>p-trend</i>             | 0.421             | <i>p-trend</i>            | 0.09         |
| LBMI         | Low         | (Reference)               |                   | (Reference)               |                   | (Reference)                |                   | (Reference)               |              |
|              | Medium-low  | 0.28 [0.11; 0.45]         | <b>0.001</b>      | 0.25 [0.10; 0.41]         | <b>0.002</b>      | 0.26 [0.00; 0.51]          | <b>0.046</b>      | -0.19 [-1.79; 1.41]       | 0.817        |
|              | Medium-high | 0.47 [0.3; 0.64]          | <b>&lt;0.0001</b> | 0.43 [0.28; 0.59]         | <b>&lt;0.0001</b> | 0.46 [0.20; 0.71]          | <b>&lt;0.0001</b> | -0.02 [-1.62; 1.59]       | 0.984        |
|              | High        | 0.65 [0.45; 0.85]         | <b>&lt;0.0001</b> | 0.56 [0.38; 0.74]         | <b>&lt;0.0001</b> | 0.55 [0.26; 0.85]          | <b>&lt;0.0001</b> | -0.58 [-2.42; 1.27]       | 0.539        |
|              |             | <i>p-trend</i>            | <b>&lt;0.0001</b> | <i>p-trend</i>            | <b>&lt;0.0001</b> | <i>p-trend</i>             | <b>&lt;0.0001</b> | <i>p-trend</i>            | 0.728        |
| FMI          | Low         | (Reference)               |                   | (Reference)               |                   | (Reference)                |                   | (Reference)               |              |
|              | Medium-low  | 0.04 [-0.07; 0.15]        | 0.452             | 0.07 [-0.03; 0.18]        | 0.155             | 0.18 [0.01; 0.35]          | <b>0.035</b>      | 0.68 [-0.36; 1.72]        | 0.198        |
|              | Medium-high | 0.05 [-0.08; 0.18]        | 0.436             | 0.01 [-0.11; 0.13]        | 0.859             | -0.01 [-0.20; 0.18]        | 0.945             | -0.84 [-2.02; 0.34]       | 0.162        |
|              | High        | -0.02 [-0.19; 0.15]       | 0.805             | -0.08 [-0.24; 0.07]       | 0.304             | -0.15 [-0.41; 0.10]        | 0.246             | -1.32 [-2.89; 0.25]       | 0.099        |
|              |             | <i>p-trend</i>            | 0.903             | <i>p-trend</i>            | 0.342             | <i>p-trend</i>             | 0.198             | <i>p-trend</i>            | <b>0.025</b> |
| <b>GIRLS</b> |             |                           |                   |                           |                   |                            |                   |                           |              |
| BMI          | Normal-low  | (Reference)               |                   | (Reference)               |                   | (Reference)                |                   | (Reference)               |              |
|              | Normal-high | 0.07 [-0.02; 0.15]        | 0.127             | 0.04 [-0.04; 0.13]        | 0.308             | 0.07 [-0.08; 0.23]         | 0.357             | -0.85 [-1.92; 0.23]       | 0.123        |
|              | Overweight  | 0.11 [0.01; 0.22]         | <b>0.032</b>      | 0.07 [-0.03; 0.17]        | 0.193             | 0.07 [-0.11; 0.25]         | 0.462             | -1.67 [-2.93; -0.41]      | <b>0.009</b> |
|              | Obese       | 0.18 [0.03; 0.34]         | <b>0.020</b>      | 0.10 [-0.05; 0.25]        | 0.211             | 0.06 [-0.21; 0.33]         | 0.660             | -2.56 [-4.43; -0.69]      | <b>0.007</b> |
|              |             | <i>p-trend</i>            | <b>0.008</b>      | <i>p-trend</i>            | 0.134             | <i>p-trend</i>             | 0.523             | <i>p-trend</i>            | <b>0.001</b> |
| LBMI         | Low         | (Reference)               |                   | (Reference)               |                   | (Reference)                |                   | (Reference)               |              |
|              | Medium-low  | 0.19 [0.08; 0.30]         | <b>0.001</b>      | 0.21 [0.10; 0.32]         | <b>&lt;0.0001</b> | 0.34 [0.14; 0.54]          | <b>0.001</b>      | 0.61 [-0.77; 2.00]        | 0.384        |
|              | Medium-high | 0.31 [0.19; 0.42]         | <b>&lt;0.0001</b> | 0.30 [0.19; 0.41]         | <b>&lt;0.0001</b> | 0.44 [0.23; 0.64]          | <b>&lt;0.0001</b> | 0.04 [-1.39; 1.46]        | 0.960        |
|              | High        | 0.36 [0.21; 0.52]         | <b>&lt;0.0001</b> | 0.29 [0.14; 0.44]         | <b>&lt;0.0001</b> | 0.34 [0.06; 0.61]          | <b>0.015</b>      | -1.4 [-3.27; 0.47]        | 0.142        |
|              |             | <i>p-trend</i>            | <b>&lt;0.0001</b> | <i>p-trend</i>            | <b>&lt;0.0001</b> | <i>p-trend</i>             | <b>0.004</b>      | <i>p-trend</i>            | 0.092        |
| FMI          | Low         | (Reference)               |                   | (Reference)               |                   | [Reference]                |                   | (Reference)               |              |
|              | Medium-low  | 0.03 [-0.07; 0.14]        | 0.501             | 0.03 [-0.07; 0.13]        | 0.525             | 0.12 [-0.06; 0.30]         | 0.191             | -0.44 [-1.72; 0.84]       | 0.496        |
|              | Medium-high | 0.02 [-0.09; 0.13]        | 0.696             | 0.00 [-0.10; 0.11]        | 0.931             | 0.01 [-0.19; 0.20]         | 0.959             | -1.05 [-2.38; 0.28]       | 0.122        |
|              | High        | 0.09 [-0.04; 0.23]        | 0.185             | 0.04 [-0.09; 0.17]        | 0.535             | 0.04 [-0.20; 0.28]         | 0.730             | -1.53 [-3.21; 0.15]       | 0.074        |
|              |             | <i>p-trend</i>            | 0.392             | <i>p-trend</i>            | 0.970             | <i>p-trend</i>             | 0.561             | <i>p-trend</i>            | <b>0.026</b> |

Definition of abbreviations: BMI, body mass index; FEF<sub>25-75</sub> forced expiratory flow at 25-75%; FEV<sub>1</sub>, volume expired in the first second; FMI, fat mass index; FVC, forced vital capacity; LBMI, lean body mass index; 95% CI, 95% confidence intervals;  $\beta$ , estimate of regression coefficient. Models are adjusted for maternal social class, maternal smoking during pregnancy, birth weight, breastfeeding, total energy intake at 7 years, lung function measures at 8 years, wear-time spent in MVPA at 11 years, pubertal status (age at menarche for girls and voice break status at age 15 years for boys), as well as age and height at 15 years. Models for FMI and LBMI are also mutually adjusted. Bold: p-value <0.05

**Table E9. Adjusted associations of body weight and composition trajectories with post-bronchodilation lung function measures at age 15 years: Excluding children with lifetime doctor-diagnosed asthma (n=865)**

|              |             | FVC (L)             |                   | FEV <sub>1</sub> (L) |                   | FEF <sub>25-75</sub> (L/s) |                   | FEV <sub>1</sub> /FVC (%) |              |
|--------------|-------------|---------------------|-------------------|----------------------|-------------------|----------------------------|-------------------|---------------------------|--------------|
|              |             | Adjusted β [95% CI] | p-value           | Adjusted β [95% CI]  | p-value           | Adjusted β [95% CI]        | p-value           | Adjusted β [95% CI]       | p-value      |
| <b>BOYS</b>  |             |                     |                   |                      |                   |                            |                   |                           |              |
| BMI          | Normal-low  | (Reference)         |                   | (Reference)          |                   | (Reference)                |                   | (Reference)               |              |
|              | Normal-high | 0.15 [0.04; 0.26]   | <b>0.009</b>      | 0.13 [0.03; 0.23]    | <b>0.011</b>      | 0.18 [0.01; 0.34]          | <b>0.037</b>      | -0.28 [-1.23; 0.68]       | 0.572        |
|              | Overweight  | 0.17 [0.04; 0.31]   | <b>0.009</b>      | 0.14 [0.01; 0.26]    | <b>0.029</b>      | 0.19 [-0.01; 0.38]         | 0.059             | -0.99 [-2.12; 0.15]       | 0.089        |
|              | Obese       | 0.07 [-0.12; 0.27]  | 0.447             | -0.06 [-0.23; 0.12]  | 0.512             | -0.22 [-0.5; 0.06]         | 0.130             | -2.55 [-4.2; -0.90]       | <b>0.002</b> |
|              |             | <i>p-trend</i>      | 0.052             | <i>p-trend</i>       | 0.453             | <i>p-trend</i>             | 0.942             | <i>p-trend</i>            | <b>0.003</b> |
| LBMI         | Low         | (Reference)         |                   | (Reference)          |                   | (Reference)                |                   | (Reference)               |              |
|              | Medium-low  | 0.24 [0.06; 0.43]   | <b>0.009</b>      | 0.19 [0.02; 0.36]    | <b>0.027</b>      | 0.17 [-0.11; 0.45]         | 0.232             | -1.05 [-2.71; 0.60]       | 0.213        |
|              | Medium-high | 0.48 [0.3; 0.67]    | <b>&lt;0.0001</b> | 0.42 [0.24; 0.59]    | <b>&lt;0.0001</b> | 0.41 [0.13; 0.69]          | <b>0.004</b>      | -0.85 [-2.52; 0.81]       | 0.314        |
|              | High        | 0.66 [0.44; 0.88]   | <b>&lt;0.0001</b> | 0.51 [0.31; 0.72]    | <b>&lt;0.0001</b> | 0.44 [0.1; 0.77]           | <b>0.010</b>      | -1.98 [-3.92; -0.03]      | <b>0.046</b> |
|              |             | <i>p-trend</i>      | <b>&lt;0.0001</b> | <i>p-trend</i>       | <b>&lt;0.0001</b> | <i>p-trend</i>             | <b>&lt;0.0001</b> | <i>p-trend</i>            | 0.140        |
| FMI          | Low         | (Reference)         |                   | (Reference)          |                   | (Reference)                |                   | (Reference)               |              |
|              | Medium-low  | 0.03 [-0.09; 0.14]  | 0.637             | 0.07 [-0.04; 0.17]   | 0.202             | 0.21 [0.04; 0.39]          | <b>0.015</b>      | 0.93 [-0.08; 1.93]        | 0.072        |
|              | Medium-high | 0.01 [-0.11; 0.14]  | 0.844             | 0.00 [-0.11; 0.12]   | 0.961             | 0.06 [-0.13; 0.26]         | 0.510             | -0.47 [-1.60; 0.65]       | 0.409        |
|              | High        | -0.12 [-0.29; 0.04] | 0.134             | -0.18 [-0.33; -0.04] | <b>0.015</b>      | -0.24 [-0.48; 0.01]        | 0.061             | -1.75 [-3.19; -0.32]      | <b>0.017</b> |
|              |             | <i>p-trend</i>      | 0.269             | <i>p-trend</i>       | <b>0.038</b>      | <i>p-trend</i>             | 0.117             | <i>p-trend</i>            | <b>0.008</b> |
| <b>GIRLS</b> |             |                     |                   |                      |                   |                            |                   |                           |              |
| BMI          | Normal-low  | (Reference)         |                   | (Reference)          |                   | (Reference)                |                   | (Reference)               |              |
|              | Normal-high | 0.09 [0.00; 0.17]   | <b>0.042</b>      | 0.05 [-0.03; 0.13]   | 0.254             | 0.12 [-0.03; 0.27]         | 0.117             | -0.98 [-2.04; 0.08]       | 0.071        |
|              | Overweight  | 0.13 [0.03; 0.23]   | <b>0.014</b>      | 0.08 [-0.02; 0.18]   | 0.132             | 0.06 [-0.11; 0.24]         | 0.487             | -1.94 [-3.21; -0.67]      | <b>0.003</b> |
|              | Obese       | 0.26 [0.09; 0.42]   | <b>0.002</b>      | 0.18 [0.02; 0.34]    | <b>0.028</b>      | 0.18 [-0.11; 0.47]         | 0.227             | -2.68 [-4.72; -0.65]      | <b>0.010</b> |
|              |             | <i>p-trend</i>      | <b>0.001</b>      | <i>p-trend</i>       | <b>0.028</b>      | <i>p-trend</i>             | 0.279             | <i>p-trend</i>            | <b>0.001</b> |
| LBMI         | Low         | (Reference)         |                   | (Reference)          |                   | (Reference)                |                   | (Reference)               |              |
|              | Medium-low  | 0.21 [0.10; 0.31]   | <b>&lt;0.0001</b> | 0.21 [0.10; 0.31]    | <b>&lt;0.0001</b> | 0.29 [0.10; 0.48]          | <b>0.003</b>      | 0.42 [-0.94; 1.79]        | 0.542        |
|              | Medium-high | 0.28 [0.17; 0.39]   | <b>&lt;0.0001</b> | 0.28 [0.17; 0.39]    | <b>&lt;0.0001</b> | 0.40 [0.21; 0.60]          | <b>&lt;0.0001</b> | 0.22 [-1.20; 1.63]        | 0.764        |
|              | High        | 0.40 [0.25; 0.56]   | <b>&lt;0.0001</b> | 0.34 [0.19; 0.49]    | <b>&lt;0.0001</b> | 0.41 [0.14; 0.68]          | <b>0.003</b>      | -1.14 [-3.06; 0.79]       | 0.248        |
|              |             | <i>p-trend</i>      | <b>&lt;0.0001</b> | <i>p-trend</i>       | <b>&lt;0.0001</b> | <i>p-trend</i>             | <b>&lt;0.0001</b> | <i>p-trend</i>            | 0.349        |
| FMI          | Low         | (Reference)         |                   | (Reference)          |                   | (Reference)                |                   | (Reference)               |              |
|              | Medium-low  | 0.01 [-0.09; 0.11]  | 0.807             | -0.02 [-0.12; 0.08]  | 0.707             | 0.08 [-0.10; 0.25]         | 0.401             | -0.96 [-2.24; 0.32]       | 0.140        |
|              | Medium-high | 0.03 [-0.07; 0.14]  | 0.547             | -0.02 [-0.12; 0.09]  | 0.770             | -0.01 [-0.19; 0.17]        | 0.913             | -1.82 [-3.14; -0.50]      | <b>0.007</b> |
|              | High        | 0.11 [-0.03; 0.24]  | 0.112             | 0.04 [-0.09; 0.17]   | 0.531             | 0.00 [-0.24; 0.24]         | 0.979             | -2.31 [-4.01; -0.60]      | <b>0.008</b> |
|              |             | <i>p-trend</i>      | 0.139             | <i>p-trend</i>       | 0.679             | <i>p-trend</i>             | 0.534             | <i>p-trend</i>            | <b>0.001</b> |

Definition of abbreviations: BMI, body mass index; FEF<sub>25-75</sub> forced expiratory flow at 25-75%; FEV<sub>1</sub>, volume expired in the first second; FMI, fat mass index; FVC, forced vital capacity; LBMI, lean body mass index; 95% CI, 95% confidence intervals; β, estimate of regression coefficient. Models are adjusted for maternal social class, maternal smoking during pregnancy, birth weight, breastfeeding, lung function measures at 8 years, pubertal status (age at menarche for girls and voice break status at age 15 years for boys), as well as age and height at 15 years. Models for FMI and LBMI are also mutually adjusted. Bold: p-value <0.05



**Table E10. Adjusted associations of body weight and composition trajectories with post-bronchodilation lung function measures at age 15 years: Excluding children with extreme lung function**

measures (<p1 and p>99) at age 15 years

|              |             | FVC (L)             |                   | FEV <sub>1</sub> (L) |                   | FEF <sub>25-75</sub> (L/s) |                   | FEV <sub>1</sub> /FVC (%) |                   |
|--------------|-------------|---------------------|-------------------|----------------------|-------------------|----------------------------|-------------------|---------------------------|-------------------|
|              |             | Adjusted β [95% CI] | p-value           | Adjusted β [95% CI]  | p-value           | Adjusted β [95% CI]        | p-value           | Adjusted β [95% CI]       | p-value           |
| <b>BOYS</b>  |             |                     |                   |                      |                   |                            |                   |                           |                   |
| BMI          | Normal-low  | (Reference)         |                   | (Reference)          |                   | (Reference)                |                   | (Reference)               |                   |
|              | Normal-high | 0.11 [0.03; 0.20]   | <b>0.010</b>      | 0.10 [0.02; 0.18]    | <b>0.014</b>      | 0.15 [0.02; 0.28]          | <b>0.020</b>      | -0.01 [-0.80; 0.79]       | 0.987             |
|              | Overweight  | 0.19 [0.09; 0.29]   | <b>&lt;0.0001</b> | 0.15 [0.05; 0.24]    | <b>0.002</b>      | 0.09 [-0.07; 0.24]         | 0.263             | -0.82 [-1.76; 0.13]       | 0.091             |
|              | Obese       | 0.15 [0.00; 0.30]   | <b>0.044</b>      | 0.03 [-0.1; 0.16]    | 0.618             | -0.12 [-0.33; 0.10]        | 0.291             | -1.94 [-3.28; -0.6]       | <b>0.005</b>      |
|              |             | <i>p-trend</i>      | <b>0.001</b>      | <i>p-trend</i>       | <b>0.042</b>      | <i>p-trend</i>             | 0.894             | <i>p-trend</i>            | <b>0.004</b>      |
| LBMI         | Low         | (Reference)         |                   | (Reference)          |                   | (Reference)                |                   | (Reference)               |                   |
|              | Medium-low  | 0.22 [0.08; 0.36]   | <b>0.002</b>      | 0.20 [0.07; 0.32]    | <b>0.003</b>      | 0.22 [0.02; 0.43]          | <b>0.036</b>      | -0.47 [-1.78; 0.84]       | 0.484             |
|              | Medium-high | 0.44 [0.30; 0.58]   | <b>&lt;0.0001</b> | 0.40 [0.27; 0.53]    | <b>&lt;0.0001</b> | 0.46 [0.25; 0.67]          | <b>&lt;0.0001</b> | -0.47 [-1.79; 0.85]       | 0.486             |
|              | High        | 0.57 [0.40; 0.73]   | <b>&lt;0.0001</b> | 0.50 [0.35; 0.65]    | <b>&lt;0.0001</b> | 0.49 [0.25; 0.74]          | <b>&lt;0.0001</b> | -0.74 [-2.27; 0.80]       | 0.345             |
|              |             | <i>p-trend</i>      | <b>&lt;0.0001</b> | <i>p-trend</i>       | <b>&lt;0.0001</b> | <i>p-trend</i>             | <b>&lt;0.0001</b> | <i>p-trend</i>            | 0.418             |
| FMI          | Low         | (Reference)         |                   | (Reference)          |                   | (Reference)                |                   | (Reference)               |                   |
|              | Medium-low  | 0.02 [-0.07; 0.11]  | 0.681             | 0.05 [-0.03; 0.13]   | 0.228             | 0.13 [0.00; 0.27]          | 0.050             | 0.73 [-0.11; 1.57]        | 0.089             |
|              | Medium-high | 0.05 [-0.05; 0.15]  | 0.334             | 0.01 [-0.08; 0.10]   | 0.823             | -0.06 [-0.20; 0.09]        | 0.471             | -0.79 [-1.73; 0.14]       | 0.097             |
|              | High        | -0.01 [-0.14; 0.11] | 0.820             | -0.10 [-0.22; 0.01]  | 0.076             | -0.23 [-0.42; -0.04]       | <b>0.018</b>      | -1.37 [-2.57; -0.17]      | <b>0.025</b>      |
|              |             | <i>p-trend</i>      | 0.791             | <i>p-trend</i>       | 0.131             | <i>p-trend</i>             | <b>0.008</b>      | <i>p-trend</i>            | <b>0.003</b>      |
| <b>GIRLS</b> |             |                     |                   |                      |                   |                            |                   |                           |                   |
| BMI          | Normal-low  | (Reference)         |                   | (Reference)          |                   | (Reference)                |                   | (Reference)               |                   |
|              | Normal-high | 0.07 [0.01; 0.14]   | <b>0.035</b>      | 0.05 [-0.01; 0.12]   | 0.129             | 0.15 [0.03; 0.28]          | <b>0.016</b>      | -0.96 [-1.81; -0.11]      | <b>0.027</b>      |
|              | Overweight  | 0.12 [0.04; 0.20]   | <b>0.003</b>      | 0.07 [-0.01; 0.15]   | 0.078             | 0.09 [-0.06; 0.23]         | 0.243             | -1.95 [-2.94; -0.96]      | <b>&lt;0.0001</b> |
|              | Obese       | 0.19 [0.07; 0.31]   | <b>0.002</b>      | 0.11 [-0.01; 0.22]   | 0.075             | 0.04 [-0.18; 0.27]         | 0.695             | -2.66 [-4.10; -1.22]      | <b>&lt;0.0001</b> |
|              |             | <i>p-trend</i>      | <b>&lt;0.0001</b> | <i>p-trend</i>       | <b>0.039</b>      | <i>p-trend</i>             | 0.468             | <i>p-trend</i>            |                   |
| LBMI         | Low         | (Reference)         |                   | (Reference)          |                   | (Reference)                |                   | (Reference)               |                   |
|              | Medium-low  | 0.14 [0.05; 0.23]   | <b>0.002</b>      | 0.13 [0.05; 0.22]    | <b>0.002</b>      | 0.24 [0.08; 0.41]          | <b>0.003</b>      | 0.39 [-0.71; 1.49]        | 0.489             |
|              | Medium-high | 0.26 [0.16; 0.35]   | <b>&lt;0.0001</b> | 0.23 [0.14; 0.32]    | <b>&lt;0.0001</b> | 0.34 [0.17; 0.50]          | <b>&lt;0.0001</b> | -0.17 [-1.31; 0.96]       | 0.764             |
|              | High        | 0.27 [0.15; 0.39]   | <b>&lt;0.0001</b> | 0.21 [0.10; 0.33]    | <b>&lt;0.0001</b> | 0.32 [0.09; 0.54]          | <b>0.006</b>      | -1.44 [-2.94; 0.07]       | 0.061             |
|              |             | <i>p-trend</i>      | <b>&lt;0.0001</b> | <i>p-trend</i>       | <b>&lt;0.0001</b> | <i>p-trend</i>             | <b>0.002</b>      | <i>p-trend</i>            | <b>0.032</b>      |
| FMI          | Low         | (Reference)         |                   | (Reference)          |                   | (Reference)                |                   | (Reference)               |                   |
|              | Medium-low  | 0.03 [-0.06; 0.11]  | 0.536             | 0.02 [-0.06; 0.10]   | 0.668             | 0.08 [-0.07; 0.23]         | 0.304             | -0.89 [-1.92; 0.13]       | 0.088             |
|              | Medium-high | 0.04 [-0.04; 0.13]  | 0.329             | 0.00 [-0.08; 0.08]   | 0.973             | 0.03 [-0.12; 0.19]         | 0.698             | -1.55 [-2.60; -0.49]      | <b>0.004</b>      |
|              | High        | 0.11 [0.00; 0.21]   | <b>0.041</b>      | 0.03 [-0.07; 0.13]   | 0.564             | -0.03 [-0.22; 0.17]        | 0.781             | -2.18 [-3.48; -0.87]      | <b>0.001</b>      |
|              |             | <i>p-trend</i>      | 0.067             | <i>p-trend</i>       | 0.916             | <i>p-trend</i>             | 0.502             | <i>p-trend</i>            | <b>&lt;0.0001</b> |

Definition of abbreviations: BMI, body mass index; FEF<sub>25-75</sub> forced expiratory flow at 25-75%; FEV<sub>1</sub>, volume expired in the first second; FMI, fat mass index; FVC, forced vital capacity; LBMI, lean body mass index; 95% CI, 95% confidence intervals; β, estimate of regression coefficient. Models are adjusted for maternal social class, maternal smoking during pregnancy, birth weight, breastfeeding, lung function measures at 8 years, pubertal status (age at menarche for girls and voice break status at age 15 years for boys), as well as age and height at 15 years. Models for FMI and LBMI are also mutually adjusted. Number of observations deleted from the adjusted models: FVC (boys/girls):32/36; FEV<sub>1</sub>: 32/33; FEF<sub>25-75</sub>:32/36; ratio FEV<sub>1</sub>/FVC: 60/113. Bold: p-value <0.05

**Table E11. Adjusted associations of body weight and composition trajectories with pre-bronchodilation lung function measures at age 15 years**

|              |             | FVC (L)             |                   | FEV <sub>1</sub> (L) |                   | FEF <sub>25-75</sub> (L/s) |                   | FEV <sub>1</sub> /FVC (%) |                   |
|--------------|-------------|---------------------|-------------------|----------------------|-------------------|----------------------------|-------------------|---------------------------|-------------------|
|              |             | Adjusted β [95% CI] | p-value           | Adjusted β [95% CI]  | p-value           | Adjusted β [95% CI]        | p-value           | Adjusted β [95% CI]       | p-value           |
| <b>BOYS</b>  |             |                     |                   |                      |                   |                            |                   |                           |                   |
| BMI          | Normal-low  | (Reference)         |                   | (Reference)          |                   | (Reference)                |                   | (Reference)               |                   |
|              | Normal-high | 0.16 [0.07; 0.25]   | <b>0.001</b>      | 0.15 [0.07; 0.23]    | <b>&lt;0.0001</b> | 0.16 [0.04; 0.29]          | <b>0.012</b>      | -0.16 [-1.08; 0.76]       | 0.735             |
|              | Overweight  | 0.18 [0.07; 0.29]   | <b>0.001</b>      | 0.13 [0.04; 0.23]    | <b>0.007</b>      | 0.11 [-0.04; 0.27]         | 0.143             | -0.82 [-1.91; 0.27]       | 0.139             |
|              | Obese       | 0.10 [-0.05; 0.26]  | 0.202             | -0.01 [-0.15; 0.12]  | 0.880             | -0.11 [-0.32; 0.11]        | 0.322             | -1.65 [-3.18; -0.11]      | <b>0.036</b>      |
|              |             | <i>p-trend</i>      | <b>0.008</b>      | <i>p-trend</i>       | 0.190             | <i>p-trend</i>             | 0.917             | <i>p-trend</i>            | <b>0.023</b>      |
| LBMI         | Low         | (Reference)         |                   | (Reference)          |                   | (Reference)                |                   | (Reference)               |                   |
|              | Medium-low  | 0.23 [0.09; 0.38]   | <b>0.002</b>      | 0.21 [0.08; 0.34]    | <b>0.001</b>      | 0.23 [0.02; 0.43]          | <b>0.035</b>      | 0.17 [-1.35; 1.69]        | 0.830             |
|              | Medium-high | 0.47 [0.32; 0.61]   | <b>&lt;0.0001</b> | 0.41 [0.28; 0.54]    | <b>&lt;0.0001</b> | 0.38 [0.17; 0.59]          | <b>&lt;0.0001</b> | -0.21 [-1.74; 1.32]       | 0.788             |
|              | High        | 0.63 [0.46; 0.80]   | <b>&lt;0.0001</b> | 0.53 [0.38; 0.68]    | <b>&lt;0.0001</b> | 0.49 [0.24; 0.73]          | <b>&lt;0.0001</b> | -0.42 [-2.19; 1.36]       | 0.644             |
|              |             | <i>p-trend</i>      | <b>&lt;0.0001</b> | <i>p-trend</i>       | <b>&lt;0.0001</b> | <i>p-trend</i>             | <b>&lt;0.0001</b> | <i>p-trend</i>            | 0.362             |
| FMI          | Low         | (Reference)         |                   | (Reference)          |                   | (Reference)                |                   | (Reference)               |                   |
|              | Medium-low  | 0.05 [-0.04; 0.15]  | 0.278             | 0.07 [-0.01; 0.15]   | 0.106             | 0.13 [0.00; 0.27]          | 0.057             | 0.22 [-0.75; 1.20]        | 0.653             |
|              | Medium-high | 0.03 [-0.07; 0.13]  | 0.567             | -0.01 [-0.10; 0.08]  | 0.821             | -0.04 [-0.19; 0.11]        | 0.614             | -1.07 [-2.15; 0.01]       | 0.051             |
|              | High        | -0.10 [-0.24; 0.03] | 0.131             | -0.17 [-0.28; -0.05] | <b>0.006</b>      | -0.18 [-0.38; 0.01]        | 0.060             | -1.4 [-2.78; -0.02]       | <b>0.047</b>      |
|              |             | <i>p-trend</i>      | 0.294             | <i>p-trend</i>       | <b>0.010</b>      | <i>p-trend</i>             | <b>0.032</b>      | <i>p-trend</i>            | <b>0.007</b>      |
| <b>GIRLS</b> |             |                     |                   |                      |                   |                            |                   |                           |                   |
| BMI          | Normal-low  | (Reference)         |                   | (Reference)          |                   | (Reference)                |                   | (Reference)               |                   |
|              | Normal-high | 0.05 [-0.02; 0.12]  | 0.146             | 0.03 [-0.04; 0.09]   | 0.448             | -0.01 [-0.12; 0.11]        | 0.906             | -0.92 [-1.85; 0.02]       | 0.055             |
|              | Overweight  | 0.12 [0.04; 0.21]   | <b>0.005</b>      | 0.05 [-0.03; 0.13]   | 0.190             | -0.02 [-0.16; 0.12]        | 0.764             | -1.73 [-2.83; -0.62]      | <b>0.002</b>      |
|              | Obese       | 0.20 [0.08; 0.33]   | <b>0.002</b>      | 0.06 [-0.05; 0.18]   | 0.279             | -0.03 [-0.24; 0.17]        | 0.750             | -3.25 [-4.88; -1.63]      | <b>&lt;0.0001</b> |
|              |             | <i>p-trend</i>      | <b>&lt;0.0001</b> | <i>p-trend</i>       | 0.151             | <i>p-trend</i>             | 0.702             | <i>p-trend</i>            | <b>&lt;0.0001</b> |
| LBMI         | Low         | (Reference)         |                   | (Reference)          |                   | (Reference)                |                   | (Reference)               |                   |
|              | Medium-low  | 0.17 [0.08; 0.26]   | <b>&lt;0.0001</b> | 0.16 [0.07; 0.25]    | <b>&lt;0.0001</b> | 0.21 [0.06; 0.36]          | <b>0.005</b>      | -0.18 [-1.40; 1.04]       | 0.772             |
|              | Medium-high | 0.29 [0.20; 0.39]   | <b>&lt;0.0001</b> | 0.24 [0.15; 0.33]    | <b>&lt;0.0001</b> | 0.26 [0.10; 0.41]          | <b>0.001</b>      | -0.62 [-1.88; 0.64]       | 0.333             |
|              | High        | 0.38 [0.25; 0.51]   | <b>&lt;0.0001</b> | 0.29 [0.17; 0.41]    | <b>&lt;0.0001</b> | 0.33 [0.12; 0.53]          | <b>0.002</b>      | -1.45 [-3.11; 0.22]       | 0.088             |
|              |             | <i>p-trend</i>      | <b>&lt;0.0001</b> | <i>p-trend</i>       | <b>&lt;0.0001</b> | <i>p-trend</i>             | <b>0.002</b>      | <i>p-trend</i>            | <b>0.040</b>      |
| FMI          | Low         | (Reference)         |                   | (Reference)          |                   | (Reference)                |                   | (Reference)               |                   |
|              | Medium-low  | -0.02 [-0.10; 0.06] | 0.628             | -0.02 [-0.10; 0.06]  | 0.557             | -0.03 [-0.17; 0.11]        | 0.658             | -0.64 [-1.75; 0.48]       | 0.264             |
|              | Medium-high | 0.00 [-0.09; 0.09]  | 0.971             | -0.03 [-0.11; 0.06]  | 0.530             | -0.07 [-0.22; 0.07]        | 0.318             | -1.13 [-2.29; 0.04]       | 0.058             |
|              | High        | 0.04 [-0.07; 0.15]  | 0.495             | -0.04 [-0.14; 0.06]  | 0.466             | -0.13 [-0.31; 0.05]        | 0.166             | -2.34 [-3.79; -0.9]       | <b>0.002</b>      |
|              |             | <i>p-trend</i>      | 0.462             | <i>p-trend</i>       | 0.405             | <i>p-trend</i>             | 0.101             | <i>p-trend</i>            | <b>0.001</b>      |

Definition of abbreviations: BMI, body mass index; FEF<sub>25-75</sub> forced expiratory flow at 25-75%; FEV<sub>1</sub>, volume expired in the first second; FMI, fat mass index; FVC, forced vital capacity; LBMI, lean body mass index; 95% CI, 95% confidence intervals; β, estimate of regression coefficient. Models are adjusted for maternal social class, maternal smoking during pregnancy, birth weight, breastfeeding, lung function measures at 8 years, pubertal status (age at menarche for girls and voice break status at age 15 years for boys), as well as age and height at 15 years. Models for FMI and LBMI are also mutually adjusted. Bold: p-value <0.05

**Table E12. Adjusted associations of body weight and composition trajectories with post-bronchodilation lung function measures at age 15 years: Without adjustment for lung function at 8 years**

|              |             | FVC (L)             |                   | FEV <sub>1</sub> (L) |                   | FEF <sub>25-75</sub> (L/s) |                   | FEV <sub>1</sub> /FVC (%) |                   |
|--------------|-------------|---------------------|-------------------|----------------------|-------------------|----------------------------|-------------------|---------------------------|-------------------|
|              |             | Adjusted β [95% CI] | p-value           | Adjusted β [95% CI]  | p-value           | Adjusted β [95% CI]        | p-value           | Adjusted β [95% CI]       | p-value           |
| <b>BOYS</b>  |             |                     |                   |                      |                   |                            |                   |                           |                   |
| BMI          | Normal-low  | (Reference)         |                   | (Reference)          |                   | (Reference)                |                   | (Reference)               |                   |
|              | Normal-high | 0.18 [0.09; 0.28]   | <b>&lt;0.0001</b> | 0.15 [0.07; 0.24]    | <b>&lt;0.0001</b> | 0.20 [0.06; 0.35]          | <b>0.007</b>      | -0.43 [-1.30; 0.45]       | 0.338             |
|              | Overweight  | 0.29 [0.18; 0.39]   | <b>&lt;0.0001</b> | 0.21 [0.12; 0.31]    | <b>&lt;0.0001</b> | 0.24 [0.07; 0.41]          | <b>0.007</b>      | -1.18 [-2.21; -0.16]      | <b>0.024</b>      |
|              | Obese       | 0.26 [0.10; 0.41]   | <b>0.001</b>      | 0.09 [-0.05; 0.22]   | 0.212             | -0.10 [-0.34; 0.14]        | 0.421             | -2.68 [-4.12; -1.24]      | <b>&lt;0.0001</b> |
|              |             | <i>p-trend</i>      | <b>&lt;0.0001</b> | <i>p-trend</i>       | <b>0.001</b>      | <i>p-trend</i>             | 0.336             | <i>p-trend</i>            | <b>&lt;0.0001</b> |
| LBMI         | Low         | (Reference)         |                   | (Reference)          |                   | (Reference)                |                   | (Reference)               |                   |
|              | Medium-low  | 0.23 [0.09; 0.37]   | <b>0.002</b>      | 0.18 [0.05; 0.31]    | <b>0.008</b>      | 0.17 [-0.06; 0.40]         | 0.143             | -0.67 [-2.08; 0.74]       | 0.352             |
|              | Medium-high | 0.47 [0.33; 0.62]   | <b>&lt;0.0001</b> | 0.39 [0.26; 0.53]    | <b>&lt;0.0001</b> | 0.43 [0.20; 0.66]          | <b>&lt;0.0001</b> | -0.76 [-2.18; 0.66]       | 0.295             |
|              | High        | 0.73 [0.56; 0.90]   | <b>&lt;0.0001</b> | 0.59 [0.44; 0.74]    | <b>&lt;0.0001</b> | 0.59 [0.32; 0.86]          | <b>&lt;0.0001</b> | -1.27 [-2.91; 0.37]       | 0.128             |
|              |             | <i>p-trend</i>      | <b>&lt;0.0001</b> | <i>p-trend</i>       | <b>&lt;0.0001</b> | <i>p-trend</i>             | <b>&lt;0.0001</b> | <i>p-trend</i>            | 0.111             |
| FMI          | Low         | (Reference)         |                   | (Reference)          |                   | (Reference)                |                   | (Reference)               |                   |
|              | Medium-low  | 0.05 [-0.05; 0.15]  | 0.312             | 0.09 [0.00; 0.17]    | <b>0.049</b>      | 0.2 [0.05; 0.36]           | <b>0.010</b>      | 0.91 [-0.02; 1.84]        | 0.055             |
|              | Medium-high | 0.04 [-0.06; 0.15]  | 0.410             | 0.02 [-0.07; 0.12]   | 0.649             | 0.03 [-0.14; 0.20]         | 0.755             | -0.67 [-1.70; 0.36]       | 0.201             |
|              | High        | 0.00 [-0.13; 0.14]  | 0.982             | -0.09 [-0.21; 0.03]  | 0.129             | -0.20 [-0.42; 0.01]        | 0.066             | -2.02 [-3.31; -0.73]      | <b>0.002</b>      |
|              |             | <i>p-trend</i>      | 0.796             | <i>p-trend</i>       | 0.171             | <i>p-trend</i>             | 0.067             | <i>p-trend</i>            | <b>&lt;0.0001</b> |
| <b>GIRLS</b> |             |                     |                   |                      |                   |                            |                   |                           |                   |
| BMI          | Normal-low  | (Reference)         |                   | (Reference)          |                   | (Reference)                |                   | (Reference)               |                   |
|              | Normal-high | 0.16 [0.08; 0.23]   | <b>&lt;0.0001</b> | 0.11 [0.04; 0.19]    | <b>0.003</b>      | 0.13 [-0.01; 0.26]         | 0.066             | -1.11 [-2.02; -0.20]      | <b>0.017</b>      |
|              | Overweight  | 0.26 [0.17; 0.35]   | <b>&lt;0.0001</b> | 0.16 [0.07; 0.24]    | <b>&lt;0.0001</b> | 0.08 [-0.08; 0.24]         | 0.324             | -2.43 [-3.49; -1.37]      | <b>&lt;0.0001</b> |
|              | Obese       | 0.42 [0.28; 0.55]   | <b>&lt;0.0001</b> | 0.25 [0.13; 0.38]    | <b>&lt;0.0001</b> | 0.09 [-0.15; 0.32]         | 0.470             | -3.88 [-5.43; -2.32]      | <b>&lt;0.0001</b> |
|              |             | <i>p-trend</i>      | <b>&lt;0.0001</b> | <i>p-trend</i>       | <b>&lt;0.0001</b> | <i>p-trend</i>             | 0.404             | <i>p-trend</i>            | <b>&lt;0.0001</b> |
| LBMI         | Low         | (Reference)         |                   | (Reference)          |                   | (Reference)                |                   | (Reference)               |                   |
|              | Medium-low  | 0.23 [0.14; 0.33]   | <b>&lt;0.0001</b> | 0.23 [0.13; 0.32]    | <b>&lt;0.0001</b> | 0.34 [0.17; 0.52]          | <b>&lt;0.0001</b> | 0.65 [-0.52; 1.82]        | 0.277             |
|              | Medium-high | 0.42 [0.32; 0.52]   | <b>&lt;0.0001</b> | 0.37 [0.27; 0.47]    | <b>&lt;0.0001</b> | 0.43 [0.25; 0.61]          | <b>&lt;0.0001</b> | -0.22 [-1.43; 0.99]       | 0.719             |
|              | High        | 0.57 [0.43; 0.70]   | <b>&lt;0.0001</b> | 0.45 [0.33; 0.58]    | <b>&lt;0.0001</b> | 0.44 [0.20; 0.68]          | <b>&lt;0.0001</b> | -1.43 [-3.02; 0.17]       | 0.079             |
|              |             | <i>p-trend</i>      | <b>&lt;0.0001</b> | <i>p-trend</i>       | <b>&lt;0.0001</b> | <i>p-trend</i>             | <b>&lt;0.0001</b> | <i>p-trend</i>            | <b>0.013</b>      |
| FMI          | Low         | (Reference)         |                   | (Reference)          |                   | (Reference)                |                   | (Reference)               |                   |
|              | Medium-low  | 0.06 [-0.03; 0.15]  | 0.182             | 0.04 [-0.05; 0.12]   | 0.400             | 0.11 [-0.05; 0.27]         | 0.189             | -0.85 [-1.94; 0.24]       | 0.127             |
|              | Medium-high | 0.10 [0.01; 0.20]   | <b>0.030</b>      | 0.05 [-0.04; 0.14]   | 0.296             | 0.05 [-0.12; 0.21]         | 0.591             | -1.66 [-2.78; -0.54]      | <b>0.004</b>      |
|              | High        | 0.15 [0.04; 0.27]   | <b>0.010</b>      | 0.05 [-0.06; 0.16]   | 0.387             | -0.02 [-0.23; 0.19]        | 0.865             | -2.69 [-4.08; -1.31]      | <b>&lt;0.0001</b> |
|              |             | <i>p-trend</i>      | <b>0.007</b>      | <i>p-trend</i>       | 0.450             | <i>p-trend</i>             | 0.489             | <i>p-trend</i>            | <b>&lt;0.0001</b> |

Definition of abbreviations: BMI, body mass index; FEF<sub>25-75</sub> forced expiratory flow at 25-75%; FEV<sub>1</sub>, volume expired in the first second; FMI, fat mass index; FVC, forced vital capacity; LBMI, lean body mass index; 95% CI, 95% confidence intervals; β, estimate of regression coefficient. Models are adjusted for maternal social class, maternal smoking during pregnancy, birth weight, breastfeeding, pubertal status (age at menarche for girls and voice break status at age 15 years for boys), as well as age and height at 15 years. Models for FMI and LBMI are also mutually adjusted. Bold: p-value <0.05

**Table E13. Adjusted associations of body weight and composition trajectories with post-bronchodilation lung function measures at age 15 years: Using lung function measures as standard deviation scores derived using the Global Lung Initiative equations**

|              |             | FVC (L)             |              | FEV <sub>1</sub> (L) |              | FEF <sub>25-75</sub> (L/s) |              | FEV <sub>1</sub> /FVC (%) |              |
|--------------|-------------|---------------------|--------------|----------------------|--------------|----------------------------|--------------|---------------------------|--------------|
|              |             | Adjusted β [95% CI] | p-value      | Adjusted β [95% CI]  | p-value      | Adjusted β [95% CI]        | p-value      | Adjusted β [95% CI]       | p-value      |
| <b>BOYS</b>  |             |                     |              |                      |              |                            |              |                           |              |
| BMI          | Normal-low  | (Reference)         |              | (Reference)          |              | (Reference)                |              | (Reference)               |              |
|              | Normal-high | 0.36 [0.18; 0.54]   | <0.0001      | 0.38 [0.2; 0.56]     | <0.0001      | 0.25 [0.11; 0.39]          | <b>0.001</b> | 0.01 [-0.15; 0.16]        | 0.935        |
|              | Overweight  | 0.51 [0.29; 0.73]   | <0.0001      | 0.42 [0.2; 0.63]     | <0.0001      | 0.18 [0.01; 0.36]          | <b>0.037</b> | -0.18 [-0.37; 0.01]       | 0.058        |
|              | Obese       | 0.61 [0.31; 0.92]   | <0.0001      | 0.44 [0.13; 0.75]    | <b>0.006</b> | 0.12 [-0.13; 0.37]         | 0.335        | -0.30 [-0.56; -0.04]      | <b>0.025</b> |
|              |             | <i>p-trend</i>      | <0.0001      | <i>p-trend</i>       | <0.0001      | <i>p-trend</i>             | 0.070        | <i>p-trend</i>            | <b>0.009</b> |
| LBMI         | Low         | (Reference)         |              | (Reference)          |              | (Reference)                |              | (Reference)               |              |
|              | Medium-low  | 0.56 [0.27; 0.84]   | <0.0001      | 0.55 [0.26; 0.85]    | <0.0001      | 0.27 [0.04; 0.50]          | <b>0.024</b> | -0.10 [-0.36; 0.15]       | 0.433        |
|              | Medium-high | 0.95 [0.66; 1.23]   | <0.0001      | 0.99 [0.69; 1.28]    | <0.0001      | 0.53 [0.30; 0.76]          | <0.0001      | -0.04 [-0.29; 0.22]       | 0.763        |
|              | High        | 1.32 [0.99; 1.65]   | <0.0001      | 1.28 [0.94; 1.62]    | <0.0001      | 0.64 [0.37; 0.91]          | <0.0001      | -0.17 [-0.46; 0.12]       | 0.247        |
|              |             | <i>p-trend</i>      | <0.0001      | <i>p-trend</i>       | <0.0001      | <i>p-trend</i>             | <0.0001      | <i>p-trend</i>            | 0.614        |
| FMI          | Low         | (Reference)         |              | (Reference)          |              | (Reference)                |              | (Reference)               |              |
|              | Medium-low  | 0.13 [-0.06; 0.31]  | 0.176        | 0.19 [0.00; 0.38]    | <b>0.045</b> | 0.19 [0.04; 0.34]          | <b>0.011</b> | 0.13 [-0.03; 0.29]        | 0.110        |
|              | Medium-high | 0.17 [-0.04; 0.38]  | 0.107        | 0.06 [-0.15; 0.27]   | 0.549        | -0.01 [-0.18; 0.16]        | 0.917        | -0.18 [-0.37; 0.00]       | <b>0.046</b> |
|              | High        | 0.10 [-0.18; 0.37]  | 0.487        | -0.07 [-0.34; 0.21]  | 0.637        | -0.12 [-0.34; 0.10]        | 0.302        | -0.27 [-0.51; -0.03]      | <b>0.025</b> |
|              |             | <i>p-trend</i>      | 0.255        | <i>p-trend</i>       | 0.633        | <i>p-trend</i>             | 0.174        | <i>p-trend</i>            | <b>0.002</b> |
| <b>GIRLS</b> |             |                     |              |                      |              |                            |              |                           |              |
| BMI          | Normal-low  | (Reference)         |              | (Reference)          |              | (Reference)                |              | (Reference)               |              |
|              | Normal-high | 0.34 [0.16; 0.51]   | <0.0001      | 0.33 [0.14; 0.52]    | <b>0.001</b> | 0.25 [0.08; 0.41]          | <b>0.003</b> | -0.07 [-0.23; 0.10]       | 0.425        |
|              | Overweight  | 0.59 [0.4; 0.78]    | <0.0001      | 0.54 [0.32; 0.75]    | <0.0001      | 0.26 [0.07; 0.44]          | <b>0.007</b> | -0.25 [-0.44; -0.07]      | <b>0.008</b> |
|              | Obese       | 0.94 [0.65; 1.23]   | <0.0001      | 0.79 [0.47; 1.11]    | <0.0001      | 0.35 [0.07; 0.63]          | <b>0.014</b> | -0.48 [-0.76; -0.20]      | <b>0.001</b> |
|              |             | <i>p-trend</i>      | <0.0001      | <i>p-trend</i>       | <0.0001      | <i>p-trend</i>             | <b>0.003</b> | <i>p-trend</i>            | <0.0001      |
| LBMI         | Low         | (Reference)         |              | (Reference)          |              | (Reference)                |              | (Reference)               |              |
|              | Medium-low  | 0.44 [0.22; 0.65]   | <0.0001      | 0.50 [0.25; 0.74]    | <0.0001      | 0.40 [0.19; 0.61]          | <0.0001      | 0.07 [-0.14; 0.29]        | 0.503        |
|              | Medium-high | 0.71 [0.48; 0.94]   | <0.0001      | 0.78 [0.53; 1.03]    | <0.0001      | 0.56 [0.34; 0.78]          | <0.0001      | 0.02 [-0.20; 0.24]        | 0.839        |
|              | High        | 1.13 [0.83; 1.43]   | <0.0001      | 1.04 [0.71; 1.37]    | <0.0001      | 0.55 [0.26; 0.83]          | <0.0001      | -0.26 [-0.55; 0.03]       | 0.076        |
|              |             | <i>p-trend</i>      | <0.0001      | <i>p-trend</i>       | <0.0001      | <i>p-trend</i>             | <0.0001      | <i>p-trend</i>            | 0.069        |
| FMI          | Low         | (Reference)         |              | (Reference)          |              | (Reference)                |              | (Reference)               |              |
|              | Medium-low  | 0.17 [-0.04; 0.37]  | 0.105        | 0.19 [-0.04; 0.42]   | 0.103        | 0.20 [0.00; 0.39]          | 0.052        | -0.02 [-0.22; 0.18]       | 0.862        |
|              | Medium-high | 0.26 [0.05; 0.47]   | <b>0.014</b> | 0.25 [0.02; 0.48]    | <b>0.030</b> | 0.11 [-0.09; 0.31]         | 0.266        | -0.13 [-0.33; 0.08]       | 0.216        |
|              | High        | 0.45 [0.19; 0.71]   | <b>0.001</b> | 0.37 [0.08; 0.65]    | <b>0.011</b> | 0.15 [-0.10; 0.40]         | 0.230        | -0.29 [-0.55; -0.04]      | <b>0.023</b> |
|              |             | <i>p-trend</i>      | <0.0001      | <i>p-trend</i>       | <b>0.013</b> | <i>p-trend</i>             | 0.603        | <i>p-trend</i>            | <b>0.006</b> |

Definition of abbreviations: BMI, body mass index; FEF<sub>25-75</sub> forced expiratory flow at 25-75%; FEV<sub>1</sub>, volume expired in the first second; FMI, fat mass index; FVC, forced vital capacity; LBMI, lean body mass index; 95% CI, 95% confidence intervals; β, estimate of regression coefficient. Models are adjusted for maternal social class, maternal smoking during pregnancy, birth weight, breastfeeding, lung function measures at 8 years and pubertal status (age at menarche for girls and voice break for boys status at age 15 years for boys). Models for FMI and LBMI are also mutually adjusted. Bold: p-value <0.05

**Table E14. Adjusted associations of body weight and composition trajectories with pre-bronchodilation lung function growth rates from age 8 to 15 years: Models additionally adjusted for wear-time spent in MVPA and total energy intake**

|              |             | FVC change (mL/year) |                   | FEV <sub>1</sub> change (mL/year) |                   | FEF <sub>25-75</sub> change (mL/s·year) |                   |
|--------------|-------------|----------------------|-------------------|-----------------------------------|-------------------|-----------------------------------------|-------------------|
|              |             | Adjusted β [95% CI]  | p-value           | Adjusted β [95% CI]               | p-value           | Adjusted β [95% CI]                     | p-value           |
| <b>BOYS</b>  |             |                      |                   |                                   |                   |                                         |                   |
| BMI          | Normal-low  | (Reference)          |                   | (Reference)                       |                   | (Reference)                             |                   |
|              | Normal-high | 28.7 [13.0; 44.5]    | <b>&lt;0.0001</b> | 25.7 [11.7; 39.7]                 | <b>&lt;0.0001</b> | 26.5 [4.1; 48.9]                        | <b>0.021</b>      |
|              | Overweight  | 36.2 [16.9; 55.5]    | <b>&lt;0.0001</b> | 26.6 [9.5; 43.7]                  | <b>0.002</b>      | 23.1 [-4.0; 50.3]                       | 0.095             |
|              | Obese       | 20.5 [-8.7; 49.6]    | 0.168             | 6.0 [-19.7; 31.6]                 | 0.647             | -9.6 [-50.6; 31.4]                      | 0.646             |
|              |             | <i>p-trend</i>       | <b>0.002</b>      | <i>p-trend</i>                    | <b>0.036</b>      | <i>p-trend</i>                          | 0.473             |
| LBMI         | Low         | (Reference)          |                   | (Reference)                       |                   | (Reference)                             |                   |
|              | Medium-low  | 40.0 [15.4; 64.7]    | <b>0.002</b>      | 34.6 [12.4; 56.8]                 | <b>0.002</b>      | 36.8 [0.9; 72.8]                        | <b>0.044</b>      |
|              | Medium-high | 72.2 [47.4; 97.1]    | <b>&lt;0.0001</b> | 63.4 [41.1; 85.7]                 | <b>&lt;0.0001</b> | 59.9 [23.9; 96.0]                       | <b>0.001</b>      |
|              | High        | 95.0 [66.1; 124]     | <b>&lt;0.0001</b> | 79.3 [53.4; 105.1]                | <b>&lt;0.0001</b> | 73.9 [32.1; 115.7]                      | <b>0.001</b>      |
|              |             | <i>p-trend</i>       | <b>&lt;0.0001</b> | <i>p-trend</i>                    | <b>&lt;0.0001</b> | <i>p-trend</i>                          | <b>&lt;0.0001</b> |
| FMI          | Low         | (Reference)          |                   | (Reference)                       |                   | (Reference)                             |                   |
|              | Medium-low  | 6.0 [-10.3; 22.3]    | 0.470             | 7.4 [-7.1; 21.9]                  | 0.318             | 17.2 [-6.5; 40.8]                       | 0.155             |
|              | Medium-high | 8.1 [-10.5; 26.6]    | 0.393             | 0.5 [-15.9; 17.0]                 | 0.948             | -0.6 [-27.5; 26.3]                      | 0.963             |
|              | High        | -10.1 [-35.0; 14.9]  | 0.429             | -21.0 [-43.1; 1.0]                | 0.062             | -22.2 [-58.2; 13.8]                     | 0.226             |
|              |             | <i>p-trend</i>       | 0.832             | <i>p-trend</i>                    | 0.132             | <i>p-trend</i>                          | 0.235             |
| <b>GIRLS</b> |             |                      |                   |                                   |                   |                                         |                   |
| BMI          | Normal-low  | (Reference)          |                   | (Reference)                       |                   | (Reference)                             |                   |
|              | Normal-high | 2.8 [-9.4; 14.9]     | 0.654             | -0.5 [-11.8; 10.8]                | 0.933             | -10.9 [-30.6; 8.9]                      | 0.282             |
|              | Overweight  | 11.9 [-2.4; 26.2]    | 0.103             | 3.4 [-9.9; 16.7]                  | 0.615             | -13.7 [-36.8; 9.4]                      | 0.244             |
|              | Obese       | 20.8 [-0.8; 42.4]    | 0.059             | 3.9 [-16.2; 23.9]                 | 0.706             | -11.4 [-46.3; 23.5]                     | 0.520             |
|              |             | <i>p-trend</i>       | <b>0.028</b>      | <i>p-trend</i>                    | 0.558             | <i>p-trend</i>                          | 0.301             |
| LBMI         | Low         | (Reference)          |                   | (Reference)                       |                   | (Reference)                             |                   |
|              | Medium-low  | 27.4 [12.1; 42.7]    | <b>&lt;0.0001</b> | 25.3 [10.9; 39.8]                 | <b>0.001</b>      | 33.0 [7.7; 58.3]                        | <b>0.011</b>      |
|              | Medium-high | 43.5 [27.4; 59.6]    | <b>&lt;0.0001</b> | 35.5 [20.4; 50.6]                 | <b>&lt;0.0001</b> | 33.9 [7.5; 60.2]                        | <b>0.012</b>      |
|              | High        | 50.7 [29.4; 72]      | <b>&lt;0.0001</b> | 36.6 [16.7; 56.5]                 | <b>&lt;0.0001</b> | 34.6 [-0.2; 69.4]                       | 0.052             |
|              |             | <i>p-trend</i>       | <b>&lt;0.0001</b> | <i>p-trend</i>                    | <b>&lt;0.0001</b> | <i>p-trend</i>                          | 0.056             |
| FMI          | Low         | (Reference)          |                   | (Reference)                       |                   | (Reference)                             |                   |
|              | Medium-low  | -3.9 [-18.0; 10.2]   | 0.588             | -2.8 [-16.1; 10.5]                | 0.676             | -4.0 [-27.5; 19.5]                      | 0.738             |
|              | Medium-high | -4.7 [-19.5; 10.1]   | 0.534             | -7.1 [-20.9; 6.7]                 | 0.316             | -16.9 [-41.4; 7.6]                      | 0.177             |
|              | High        | 2.5 [-16.1; 21.2]    | 0.792             | -5.1 [-22.6; 12.4]                | 0.569             | -16.5 [-47.4; 14.5]                     | 0.296             |
|              |             | <i>p-trend</i>       | 0.973             | <i>p-trend</i>                    | 0.295             | <i>p-trend</i>                          | 0.098             |

Rate of lung function growth for each parameter was calculated as: (pre-bronchodilation lung function measure at 15 years - pre-bronchodilation lung function measure at 8 years)/time follow-up. Definition of abbreviations: BMI, body mass index; FEF<sub>25-75</sub> forced expiratory flow at 25-75%; FEV<sub>1</sub>, volume expired in the first second; FMI, fat mass index; FVC, forced vital capacity; LBMI, lean body mass index; 95% CI, 95% confidence intervals; β, estimate of regression coefficient. Models are adjusted for maternal social class, maternal smoking during pregnancy, birth weight, breastfeeding, total energy intake at 7 years, lung function measures at 8 years, wear-time spent in MVPA at 11 years, pubertal status (age at menarche for girls and voice break status at age 15 years for boys), as well as age and height at 15 years. Models for FMI and LBMI are also mutually adjusted. Bold: p-value <0.05

**Table E15. Adjusted associations of body weight and composition trajectories with pre-bronchodilation lung function growth rates from age 8 to 15 years: Excluding children with lifetime doctor asthma (n=865)**

|              |             | FVC change (mL/year) |                   | FEV <sub>1</sub> change (mL/year) |                   | FEF <sub>25-75</sub> change (mL/s·year) |                   |
|--------------|-------------|----------------------|-------------------|-----------------------------------|-------------------|-----------------------------------------|-------------------|
|              |             | Adjusted β [95% CI]  | p-value           | Adjusted β [95% CI]               | p-value           | Adjusted β [95% CI]                     | p-value           |
| <b>BOYS</b>  |             |                      |                   |                                   |                   |                                         |                   |
| BMI          | Normal-low  | (Reference)          |                   | (Reference)                       |                   | (Reference)                             |                   |
|              | Normal-high | 26.8 [10.7; 42.9]    | <b>0.001</b>      | 23.5 [9.2; 37.7]                  | <b>0.001</b>      | 27.5 [5.2; 49.7]                        | <b>0.016</b>      |
|              | Overweight  | 30.8 [11.5; 50.0]    | <b>0.002</b>      | 21.4 [4.2; 38.6]                  | <b>0.015</b>      | 20.2 [-6.2; 46.6]                       | 0.134             |
|              | Obese       | 10.9 [-17.1; 38.8]   | 0.446             | -8.8 [-33.4; 15.8]                | 0.482             | -24.4 [-62.8; 14.0]                     | 0.212             |
|              |             | <i>p-trend</i>       | <b>0.026</b>      | <i>p-trend</i>                    | 0.404             | <i>p-trend</i>                          | 0.985             |
| LBMI         | Low         | (Reference)          |                   | (Reference)                       |                   | (Reference)                             |                   |
|              | Medium-low  | 33.1 [6.4; 59.7]     | <b>0.015</b>      | 27.8 [3.5; 52.0]                  | <b>0.025</b>      | 26.0 [-12.0; 64.0]                      | 0.179             |
|              | Medium-high | 71.5 [44.6; 98.3]    | <b>&lt;0.0001</b> | 58.4 [34.0; 82.8]                 | <b>&lt;0.0001</b> | 49.5 [11.3; 87.7]                       | <b>0.011</b>      |
|              | High        | 98.7 [66.9; 130.4]   | <b>&lt;0.0001</b> | 77.3 [48.6; 106.0]                | <b>&lt;0.0001</b> | 67.3 [22.3; 112.3]                      | <b>0.003</b>      |
|              |             | <i>p-trend</i>       | <b>&lt;0.0001</b> | <i>p-trend</i>                    | <b>&lt;0.0001</b> | <i>p-trend</i>                          | <b>&lt;0.0001</b> |
| FMI          | Low         | (Reference)          |                   | (Reference)                       |                   | (Reference)                             |                   |
|              | Medium-low  | 7.5 [-8.9; 23.9]     | 0.369             | 12.6 [-2.0; 27.2]                 | 0.092             | 29.1 [5.7; 52.4]                        | <b>0.015</b>      |
|              | Medium-high | 6.2 [-12.1; 24.5]    | 0.505             | 2.8 [-13.5; 19.2]                 | 0.736             | 5.7 [-20.4; 31.7]                       | 0.669             |
|              | High        | -17.5 [-41.0; 6.0]   | 0.144             | -28.5 [-49.3; -7.7]               | <b>0.007</b>      | -32.0 [-65.3; 1.3]                      | 0.059             |
|              |             | <i>p-trend</i>       | 0.368             | <i>p-trend</i>                    | <b>0.030</b>      | <i>p-trend</i>                          | 0.088             |
| <b>GIRLS</b> |             |                      |                   |                                   |                   |                                         |                   |
| BMI          | Normal-low  | (Reference)          |                   | (Reference)                       |                   | (Reference)                             |                   |
|              | Normal-high | 7.1 [-4.7; 18.9]     | 0.237             | 1.7 [-9.3; 12.8]                  | 0.757             | -1.9 [-20.5; 16.8]                      | 0.844             |
|              | Overweight  | 16.5 [2.3; 30.7]     | <b>0.023</b>      | 6.6 [-6.6; 19.9]                  | 0.327             | -2.3 [-24.6; 20.0]                      | 0.839             |
|              | Obese       | 30.4 [7.3; 53.4]     | <b>0.010</b>      | 13.6 [-7.7; 34.9]                 | 0.210             | 10.3 [-26.0; 46.5]                      | 0.578             |
|              |             | <i>p-trend</i>       | <b>0.003</b>      | <i>p-trend</i>                    | 0.169             | <i>p-trend</i>                          | 0.846             |
| LBMI         | Low         | (Reference)          |                   | (Reference)                       |                   | (Reference)                             |                   |
|              | Medium-low  | 29.5 [14.7; 44.3]    | <b>&lt;0.0001</b> | 24.8 [10.7; 38.8]                 | <b>0.001</b>      | 28.5 [4.8; 52.2]                        | <b>0.018</b>      |
|              | Medium-high | 43.5 [27.7; 59.2]    | <b>&lt;0.0001</b> | 36.3 [21.5; 51.2]                 | <b>&lt;0.0001</b> | 42.6 [17.9; 67.3]                       | <b>0.001</b>      |
|              | High        | 58.2 [36.7; 79.8]    | <b>&lt;0.0001</b> | 43.7 [23.4; 64.0]                 | <b>&lt;0.0001</b> | 50.5 [16.3; 84.6]                       | <b>0.004</b>      |
|              |             | <i>p-trend</i>       | <b>&lt;0.0001</b> | <i>p-trend</i>                    | <b>&lt;0.0001</b> | <i>p-trend</i>                          | <b>0.001</b>      |
| FMI          | Low         | (Reference)          |                   | (Reference)                       |                   | (Reference)                             |                   |
|              | Medium-low  | -3.6 [-17.5; 10.3]   | 0.613             | -5.7 [-18.8; 7.3]                 | 0.387             | -6.4 [-28.8; 16.0]                      | 0.576             |
|              | Medium-high | 0.7 [-13.8; 15.1]    | 0.928             | -4.8 [-18.3; 8.7]                 | 0.487             | -12.5 [-35.7; 10.8]                     | 0.294             |
|              | High        | 5.6 [-13.1; 24.3]    | 0.559             | -3.8 [-21.3; 13.6]                | 0.668             | -16.0 [-46.1; 14.2]                     | 0.299             |
|              |             | <i>p-trend</i>       | 0.484             | <i>p-trend</i>                    | 0.651             | <i>p-trend</i>                          | 0.194             |

Definition of abbreviations: BMI, body mass index; FEF<sub>25-75</sub> forced expiratory flow at 25-75%; FEV<sub>1</sub>, volume expired in the first second; FMI, fat mass index; FVC, forced vital capacity; LBMI, lean body mass index; 95% CI, 95% confidence intervals; β, estimate of regression coefficient. Models are adjusted for maternal social class, maternal smoking during pregnancy, birth weight, breastfeeding, lung function measures at 8 years, pubertal status (age at menarche for girls and voice break status at age 15 years for boys), as well as age and height at 15 years. Models for FMI and LBMI are also mutually adjusted. Bold: p-value <0.05

**Table E16. Adjusted associations of body weight and composition trajectories with pre-bronchodilation lung function growth rates from age 8 to 15 years: Excluding children with extreme lung function growth rates (<p1 and p>99)**

|              |             | FVC change (mL/year) |                   | FEV <sub>1</sub> change (mL/year) |                   | FEF <sub>25-75</sub> change (mL/s·year) |              |
|--------------|-------------|----------------------|-------------------|-----------------------------------|-------------------|-----------------------------------------|--------------|
|              |             | Adjusted β [95% CI]  | p-value           | Adjusted β [95% CI]               | p-value           | Adjusted β [95% CI]                     | p-value      |
| <b>BOYS</b>  |             |                      |                   |                                   |                   |                                         |              |
| BMI          | Normal-low  | (Reference)          |                   | (Reference)                       |                   | (Reference)                             |              |
|              | Normal-high | 22.0 [9.5; 34.4]     | <b>0.001</b>      | 17.8 [6.8; 28.8]                  | <b>0.002</b>      | 22.8 [4.5; 41.1]                        | <b>0.015</b> |
|              | Overweight  | 30.2 [15.4; 45.0]    | <b>&lt;0.0001</b> | 21.9 [8.6; 35.1]                  | <b>0.001</b>      | 24.8 [2.9; 46.7]                        | <b>0.026</b> |
|              | Obese       | 24.9 [3.5; 46.2]     | 0.023             | 1.5 [-17.0; 20.0]                 | 0.876             | -13.7 [-44.4; 17.0]                     | 0.381        |
|              |             | <i>p-trend</i>       | <b>&lt;0.0001</b> | <i>p-trend</i>                    | 0.06              | <i>p-trend</i>                          | 0.523        |
| LBMI         | Low         | (Reference)          |                   | (Reference)                       |                   | (Reference)                             |              |
|              | Medium-low  | 28.9 [9.1; 48.7]     | <b>0.004</b>      | 28.2 [10.5; 45.8]                 | <b>0.002</b>      | 25.7 [4.9; 46.5]                        | <b>0.016</b> |
|              | Medium-high | 63.6 [43.7; 83.6]    | <b>&lt;0.0001</b> | 57.4 [39.6; 75.2]                 | <b>&lt;0.0001</b> | 34.0 [12.5; 55.5]                       | <b>0.002</b> |
|              | High        | 83.0 [59.5; 106.4]   | <b>&lt;0.0001</b> | 70.4 [49.6; 91.2]                 | <b>&lt;0.0001</b> | 42.1 [13.8; 70.4]                       | <b>0.004</b> |
|              |             | <i>p-trend</i>       | <b>&lt;0.0001</b> | <i>p-trend</i>                    | <b>&lt;0.0001</b> | <i>p-trend</i>                          | <b>0.003</b> |
| FMI          | Low         | (Reference)          |                   | (Reference)                       |                   | (Reference)                             |              |
|              | Medium-low  | 4.9 [-7.9; 17.7]     | 0.450             | 3.3 [-8.0; 14.6]                  | 0.566             | 6.1 [-12.7; 25.0]                       | 0.523        |
|              | Medium-high | 4.7 [-9.5; 18.9]     | 0.518             | -2.8 [-15.4; 9.8]                 | 0.659             | -4.0 [-23.6; 15.6]                      | 0.688        |
|              | High        | -5.3 [-23.8; 13.2]   | 0.572             | -21.4 [-37.6; -5.3]               | <b>0.009</b>      | -13.3 [-37.5; 10.9]                     | 0.281        |
|              |             | <i>p-trend</i>       | 0.814             | <i>p-trend</i>                    | <b>0.018</b>      | <i>p-trend</i>                          | 0.127        |
| <b>GIRLS</b> |             |                      |                   |                                   |                   |                                         |              |
| BMI          | Normal-low  | (Reference)          |                   | (Reference)                       |                   | (Reference)                             |              |
|              | Normal-high | 7.1 [-2.3; 16.6]     | 0.140             | 4.7 [-4.1; 13.5]                  | 0.297             | -0.1 [-16.0; 15.8]                      | 0.990        |
|              | Overweight  | 14.5 [3.3; 25.7]     | <b>0.011</b>      | 6.5 [-3.9; 16.8]                  | 0.219             | -3.2 [-21.7; 15.3]                      | 0.734        |
|              | Obese       | 25.4 [8.5; 42.3]     | <b>0.003</b>      | 9.9 [-5.8; 25.6]                  | 0.215             | -0.4 [-28.3; 27.5]                      | 0.979        |
|              |             | <i>p-trend</i>       | <b>0.001</b>      | <i>p-trend</i>                    | 0.148             | <i>p-trend</i>                          | 0.810        |
| LBMI         | Low         | (Reference)          |                   | (Reference)                       |                   | (Reference)                             |              |
|              | Medium-low  | 18.6 [6.5; 30.7]     | <b>0.003</b>      | 18.7 [7.3; 30.1]                  | <b>0.001</b>      | 31.3 [10.9; 51.6]                       | <b>0.003</b> |
|              | Medium-high | 35.0 [22.2; 47.8]    | <b>&lt;0.0001</b> | 30.2 [18.3; 42.1]                 | <b>&lt;0.0001</b> | 33.5 [12.4; 54.7]                       | <b>0.002</b> |
|              | High        | 43.8 [26.8; 60.9]    | <b>&lt;0.0001</b> | 32.5 [16.6; 48.4]                 | <b>&lt;0.0001</b> | 43.9 [15.6; 72.1]                       | <b>0.002</b> |
|              |             | <i>p-trend</i>       | <b>&lt;0.0001</b> | <i>p-trend</i>                    | <b>&lt;0.0001</b> | <i>p-trend</i>                          | <b>0.005</b> |
| FMI          | Low         | (Reference)          |                   | (Reference)                       |                   | (Reference)                             |              |
|              | Medium-low  | -0.9 [-12.0; 10.2]   | 0.875             | 1.4 [-9.0; 11.8]                  | 0.793             | 0.6 [-18.3; 19.5]                       | 0.950        |
|              | Medium-high | 0.3 [-11.3; 12.0]    | 0.955             | -0.7 [-11.5; 10.1]                | 0.897             | -4.6 [-24.2; 15.1]                      | 0.649        |
|              | High        | 6.2 [-8.3; 20.7]     | 0.399             | -1.7 [-15.2; 11.7]                | 0.801             | -9.3 [-33.8; 15.2]                      | 0.455        |
|              |             | <i>p-trend</i>       | 0.462             | <i>p-trend</i>                    | 0.573             | <i>p-trend</i>                          | 0.303        |

Definition of abbreviations: BMI, body mass index; FEF<sub>25-75</sub> forced expiratory flow at 25-75%; FEV<sub>1</sub>, volume expired in the first second; FMI, fat mass index; FVC, forced vital capacity; LBMI, lean body mass index; 95% CI, 95% confidence intervals; β, estimate of regression coefficient. Models are adjusted for maternal social class, maternal smoking during pregnancy, birth weight, breastfeeding, lung function measures at 8 years, pubertal status (age at menarche for girls and voice break status at age 15 years for boys), as well as age and height at 15 years. Models for FMI and LBMI are also mutually adjusted. Number of observations deleted from the adjusted models: FVC (boys/girls):262/303; FEV<sub>1</sub>: 282/340; FEF<sub>25-75</sub>:263/304. Bold: p-value <0.05

**Table E17. Adjusted associations of body weight and composition trajectories with pre-bronchodilation lung function growth rates from age 8 to 15 years: Without adjustment for lung function at 8 years**

|              |             | FVC change (mL/year) |                   | FEV <sub>1</sub> change (mL/year) |                   | FEF <sub>25-75</sub> change (mL/s·year) |                   |
|--------------|-------------|----------------------|-------------------|-----------------------------------|-------------------|-----------------------------------------|-------------------|
|              |             | Adjusted β [95% CI]  | p-value           | Adjusted β [95% CI]               | p-value           | Adjusted β [95% CI]                     | p-value           |
| <b>BOYS</b>  |             |                      |                   |                                   |                   |                                         |                   |
| BMI          | Normal-low  | (Reference)          |                   | (Reference)                       |                   | (Reference)                             |                   |
|              | Normal-high | 21.4 [8.0; 34.9]     | <b>0.002</b>      | 20.6 [8.8; 32.4]                  | <b>0.001</b>      | 24.9 [6.0; 43.7]                        | <b>0.010</b>      |
|              | Overweight  | 24.3 [8.3; 40.2]     | <b>0.003</b>      | 18.7 [4.7; 32.7]                  | <b>0.009</b>      | 19.7 [-2.6; 42.1]                       | 0.083             |
|              | Obese       | 10.8 [-11.8; 33.4]   | 0.349             | -2.4 [-22.2; 17.4]                | 0.812             | -14.1 [-45.9; 17.6]                     | 0.382             |
|              |             | <i>p-trend</i>       | <b>0.022</b>      | <i>p-trend</i>                    | 0.209             | <i>p-trend</i>                          | 0.728             |
| LBMI         | Low         | (Reference)          |                   | (Reference)                       |                   | (Reference)                             |                   |
|              | Medium-low  | 32.9 [11.3; 54.4]    | <b>0.003</b>      | 30.3 [11.2; 49.5]                 | <b>0.002</b>      | 31.0 [0.2; 61.7]                        | <b>0.048</b>      |
|              | Medium-high | 64.9 [43.2; 86.6]    | <b>&lt;0.0001</b> | 57.6 [38.4; 76.9]                 | <b>&lt;0.0001</b> | 54.7 [23.7; 85.6]                       | <b>0.001</b>      |
|              | High        | 86.0 [60.8; 111.3]   | <b>&lt;0.0001</b> | 73.8 [51.5; 96.1]                 | <b>&lt;0.0001</b> | 69.3 [33.3; 105.3]                      | <b>&lt;0.0001</b> |
|              |             | <i>p-trend</i>       | <b>&lt;0.0001</b> | <i>p-trend</i>                    | <b>&lt;0.0001</b> | <i>p-trend</i>                          | <b>&lt;0.0001</b> |
| FMI          | Low         | (Reference)          |                   | (Reference)                       |                   | (Reference)                             |                   |
|              | Medium-low  | 7.0 [-7.0; 20.9]     | 0.326             | 9.6 [-2.6; 21.9]                  | 0.122             | 20.1 [0.2; 40.1]                        | 0.047             |
|              | Medium-high | 3.4 [-12.1; 18.9]    | 0.666             | -1.9 [-15.5; 11.7]                | 0.782             | -4.9 [-26.9; 17.2]                      | 0.665             |
|              | High        | -17.6 [-37.5; 2.2]   | 0.082             | -24.7 [-42.0; -7.3]               | <b>0.005</b>      | -24.5 [-52.9; 3.8]                      | 0.090             |
|              |             | <i>p-trend</i>       | 0.195             | <i>p-trend</i>                    | <b>0.009</b>      | <i>p-trend</i>                          | <b>0.048</b>      |
| <b>GIRLS</b> |             |                      |                   |                                   |                   |                                         |                   |
| BMI          | Normal-low  | (Reference)          |                   | (Reference)                       |                   | (Reference)                             |                   |
|              | Normal-high | 7.0 [-3.4; 17.4]     | 0.186             | 4.1 [-5.7; 13.9]                  | 0.411             | -0.5 [-17.4; 16.5]                      | 0.959             |
|              | Overweight  | 16.2 [4.1; 28.4]     | <b>0.009</b>      | 7.9 [-3.5; 19.4]                  | 0.173             | -2.2 [-22.1; 17.7]                      | 0.829             |
|              | Obese       | 26.3 [8.1; 44.5]     | <b>0.005</b>      | 9.2 [-7.8; 26.1]                  | 0.290             | -5.7 [-35.4; 24.0]                      | 0.707             |
|              |             | <i>p-trend</i>       | <b>0.001</b>      | <i>p-trend</i>                    | 0.146             | <i>p-trend</i>                          | 0.710             |
| LBMI         | Low         | (Reference)          |                   | (Reference)                       |                   | (Reference)                             |                   |
|              | Medium-low  | 24.5 [11.2; 37.8]    | <b>&lt;0.0001</b> | 23.2 [10.6; 35.7]                 | <b>&lt;0.0001</b> | 30.6 [8.7; 52.5]                        | <b>0.006</b>      |
|              | Medium-high | 40.0 [26.3; 53.8]    | <b>&lt;0.0001</b> | 34.9 [21.9; 47.9]                 | <b>&lt;0.0001</b> | 36.9 [14.2; 59.6]                       | <b>0.001</b>      |
|              | High        | 51.6 [33.3; 69.9]    | <b>&lt;0.0001</b> | 40.6 [23.4; 57.7]                 | <b>&lt;0.0001</b> | 45.1 [15.0; 75.2]                       | <b>0.003</b>      |
|              |             | <i>p-trend</i>       | <b>&lt;0.0001</b> | <i>p-trend</i>                    | <b>&lt;0.0001</b> | <i>p-trend</i>                          | <b>0.003</b>      |
| FMI          | Low         | (Reference)          |                   | (Reference)                       |                   | (Reference)                             |                   |
|              | Medium-low  | -3.7 [-16.1; 8.6]    | 0.550             | -3.6 [-15.1; 8.0]                 | 0.545             | -3.9 [-24.2; 16.4]                      | 0.706             |
|              | Medium-high | -1.2 [-14; 11.6]     | 0.850             | -3.9 [-15.8; 8.1]                 | 0.527             | -9.4 [-30.5; 11.8]                      | 0.386             |
|              | High        | 3.4 [-12.6; 19.3]    | 0.679             | -5.9 [-20.8; 9.0]                 | 0.436             | -17.1 [-43.3; 9.2]                      | 0.202             |
|              |             | <i>p-trend</i>       | 0.669             | <i>p-trend</i>                    | 0.381             | <i>p-trend</i>                          | 0.131             |

Definition of abbreviations: BMI, body mass index; FEF<sub>25-75</sub> forced expiratory flow at 25-75%; FEV<sub>1</sub>, volume expired in the first second; FMI, fat mass index; FVC, forced vital capacity; LBMI, lean body mass index; 95% CI, 95% confidence intervals; β, estimate of regression coefficient. Models are adjusted for maternal social class, maternal smoking during pregnancy, birth weight, breastfeeding, pubertal status (age at menarche for girls and voice break status at age 15 years for boys), as well as age and height at 15 years. Models for FMI and LBMI are also mutually adjusted. Bold: p-value <0.05



**Table E18. Adjusted associations of body weight and composition trajectories with pre-bronchodilation lung function growth rates from age 8 to 15 years: Using lung function measures as standard deviation scores derived using the Global Lung Initiative equations**

|              |             | FVC change (mL/year) |                   | FEV <sub>1</sub> change (mL/year) |                   | FEF <sub>25-75</sub> change (mL/s·year) |                   |
|--------------|-------------|----------------------|-------------------|-----------------------------------|-------------------|-----------------------------------------|-------------------|
|              |             | Adjusted β [95% CI]  | p-value           | Adjusted β [95% CI]               | p-value           | Adjusted β [95% CI]                     | p-value           |
| <b>BOYS</b>  |             |                      |                   |                                   |                   |                                         |                   |
| BMI          | Normal-low  | (Reference)          |                   | (Reference)                       |                   | (Reference)                             |                   |
|              | Normal-high | 50.9 [26.4; 75.5]    | <b>&lt;0.0001</b> | 51.6 [27.7; 75.5]                 | <b>&lt;0.0001</b> | 33.8 [13.9; 53.7]                       | <b>0.001</b>      |
|              | Overweight  | 71.9 [42.8; 101.0]   | <b>&lt;0.0001</b> | 60.1 [31.7; 88.5]                 | <b>&lt;0.0001</b> | 36.2 [12.6; 59.9]                       | <b>0.003</b>      |
|              | Obese       | 54.6 [13.6; 95.7]    | <b>0.009</b>      | 31.9 [-7.8; 71.7]                 | 0.115             | 26.0 [-7.3; 59.3]                       | 0.125             |
|              |             | <i>p-trend</i>       | <b>&lt;0.0001</b> | <i>p-trend</i>                    | 0.001             | <i>p-trend</i>                          | 0.008             |
| LBMI         | Low         | (Reference)          |                   | (Reference)                       |                   | (Reference)                             |                   |
|              | Medium-low  | 61.4 [21.5; 101.2]   | <b>0.003</b>      | 60.7 [21.5; 99.8]                 | <b>0.002</b>      | 32.2 [-0.6; 65.1]                       | 0.055             |
|              | Medium-high | 124.7 [84.5; 164.8]  | <b>&lt;0.0001</b> | 120.5 [81.1; 160.0]               | <b>&lt;0.0001</b> | 58.3 [25.3; 91.3]                       | <b>0.001</b>      |
|              | High        | 170.8 [124.3; 217.3] | <b>&lt;0.0001</b> | 157.8 [112.4; 203.3]              | <b>&lt;0.0001</b> | 75.3 [37.2; 113.5]                      | <b>&lt;0.0001</b> |
|              |             | <i>p-trend</i>       | <b>&lt;0.0001</b> | <i>p-trend</i>                    | <b>&lt;0.0001</b> | <i>p-trend</i>                          | <b>&lt;0.0001</b> |
| FMI          | Low         | (Reference)          |                   | (Reference)                       |                   | (Reference)                             |                   |
|              | Medium-low  | 18.7 [-6.8; 44.1]    | 0.150             | 23.3 [-1.4; 48.1]                 | 0.065             | 24.7 [3.7; 45.8]                        | <b>0.021</b>      |
|              | Medium-high | 26.6 [-1.7; 54.8]    | 0.065             | 12.1 [-15.4; 39.7]                | 0.387             | 9.3 [-14; 32.6]                         | 0.433             |
|              | High        | -6.4 [-42.7; 30.0]   | 0.731             | -23.6 [-58.9; 11.7]               | 0.189             | 4.5 [-25.6; 34.5]                       | 0.771             |
|              |             | <i>p-trend</i>       | 0.629             | <i>p-trend</i>                    | 0.369             | <i>p-trend</i>                          | 0.882             |
| <b>GIRLS</b> |             |                      |                   |                                   |                   |                                         |                   |
| BMI          | Normal-low  | (Reference)          |                   | (Reference)                       |                   | (Reference)                             |                   |
|              | Normal-high | 24.0 [0.1; 47.9]     | <b>0.049</b>      | 16.5 [-8.2; 41.1]                 | 0.189             | 3.7 [-17.1; 24.5]                       | 0.727             |
|              | Overweight  | 59.2 [31.1; 87.3]    | <b>&lt;0.0001</b> | 40.0 [11.1; 68.9]                 | <b>0.007</b>      | 11.2 [-13.3; 35.6]                      | 0.371             |
|              | Obese       | 95.2 [53.3; 137.1]   | <b>&lt;0.0001</b> | 61.9 [19; 104.8]                  | <b>0.005</b>      | 22.6 [-13.9; 59.1]                      | 0.224             |
|              |             | <i>p-trend</i>       | 0.369             | <i>p-trend</i>                    | 0.001             | <i>p-trend</i>                          | 0.192             |
| LBMI         | Low         | (Reference)          |                   | (Reference)                       |                   | (Reference)                             |                   |
|              | Medium-low  | 58.1 [27.9; 88.4]    | <b>&lt;0.0001</b> | 55.7 [24.2; 87.2]                 | <b>0.001</b>      | 34.4 [7.8; 61.1]                        | <b>0.011</b>      |
|              | Medium-high | 95.0 [63.1; 126.9]   | <b>&lt;0.0001</b> | 86.4 [53.5; 119.3]                | <b>&lt;0.0001</b> | 45.9 [18.2; 73.6]                       | <b>0.001</b>      |
|              | High        | 139.5 [96.9; 182.2]  | <b>&lt;0.0001</b> | 120.3 [76.2; 164.3]               | <b>&lt;0.0001</b> | 63.0 [25.8; 100.3]                      | <b>0.001</b>      |
|              |             | <i>p-trend</i>       | <b>&lt;0.0001</b> | <i>p-trend</i>                    | <b>&lt;0.0001</b> | <i>p-trend</i>                          | <b>0.001</b>      |
| FMI          | Low         | (Reference)          |                   | (Reference)                       |                   | (Reference)                             |                   |
|              | Medium-low  | -1.9 [-30.1; 26.2]   | 0.892             | -0.7 [-29.8; 28.4]                | 0.962             | 6.4 [-18.5; 31.4]                       | 0.613             |
|              | Medium-high | 11.8 [-17.6; 41.1]   | 0.431             | 4.8 [-25.4; 35.0]                 | 0.756             | 2.6 [-23.4; 28.6]                       | 0.842             |
|              | High        | 34.2 [-1.9; 70.4]    | 0.063             | 14.1 [-23.2; 51.4]                | 0.458             | 5.1 [-27.0; 37.1]                       | 0.755             |
|              |             | <i>p-trend</i>       | <b>0.040</b>      | <i>p-trend</i>                    | 0.448             | <i>p-trend</i>                          | 0.951             |

Definition of abbreviations: BMI, body mass index; FEF<sub>25-75</sub> forced expiratory flow at 25-75%; FEV<sub>1</sub>, volume expired in the first second; FMI, fat mass index; FVC, forced vital capacity; LBMI, lean body mass index; 95% CI, 95% confidence intervals; β, estimate of regression coefficient. Models are adjusted for maternal social class, maternal smoking during pregnancy, birth weight, breastfeeding, lung function measures at 8 years and pubertal status (age at menarche for girls and voice break for boys status at age 15 years for boys). Models for FMI and LBMI are also mutually adjusted. Bold: p-value <0.05

## References

- E1. Boyd A, Golding J, Macleod J, Lawlor DA, Fraser A, Henderson J, Molloy L, Ness A, Ring S, Smith GD. Cohort profile: The 'Children of the 90s'-The index offspring of the Avon Longitudinal Study of Parents and Children. *Int J Epidemiol* 2013;42:111–127.
- E2. Fraser A, Macdonald-Wallis C, Tilling K, Boyd A, Golding J, Davey Smith G, Henderson J, Macleod J, Molloy L, Ness A, Ring S, Nelson SM, Lawlor DA. Cohort Profile: The Avon Longitudinal Study of Parents and Children: ALSPAC mothers cohort. *Int J Epidemiol* 2013;42:97–110.
- E3. Riddoch CJ, Leary SD, Ness AR, Blair SN, Deere K, Mattocks C, Griffiths A, Davey Smith G, Tilling K. Prospective associations between objective measures of physical activity and fat mass in 12-14 year old children: the Avon Longitudinal Study of Parents and Children (ALSPAC). *BMJ* 2009;339:b4544.
- E4. ATS. Standardization of Spirometry, 1994 Update. American Thoracic Society. *Am J Respir Crit Care Med* 1995;152:1107–1136.
- E5. Sonnenschein-Van Der Voort AMM, Howe LD, Granell R, Duijts L, Sterne JAC, Tilling K, Henderson AJ. Influence of childhood growth on asthma and lung function in adolescence. *J Allergy Clin Immunol* 2015;135:1435–1443e7.
- E6. Crapo RO, Casaburi R, Coates AL, Enright PL, Hankinson JL, Irvin CG, MacIntyre NR, McKay RT, Wanger JS, Anderson SD, Cockcroft DW, Fish JE, Sterk PJ. Crapo RO, Casaburi R, Coates AL, Enright PL, Hankinson JL, Irvin CG, MacIntyre NR, McKay RT, Wanger JS, An SP. Guidelines for Methacholine and Exercise Challenge Testing—1999. *Am J Respir Crit Care Med* 2000;161:309–329.
- E7. Mattocks C, Ness A, Leary S, Tilling K, Blair SN, Shield J, Deere K, Saunders J, Kirkby J, Smith GD, Wells J, Wareham N, Reilly J, Riddoch C. Use of Accelerometers in a Large Field-Based Study of Children: Protocols, Design Issues, and Effects on Precision. *J Phys Act Heal* 2008;5:S98–S111.
- E8. Nagin DS. *Group-Based Modeling of Development*. Cambridge MA, Harvard Univ Press; 2005.
- E9. Nagin DS, Odgers CL. Group-based trajectory modeling in clinical research. *Annu Rev Clin Psychol* 2010;6:109–38.
- E10. Jones BL, Nagin DS. A Note on a Stata Plugin for Estimating Group-based Trajectory Models. *Sociol Methods Res* 2013;42:608–613.
- E11. Ziyab AH, Karmaus W, Kurukulaaratchy RJ, Zhang H, Arshad SH. Developmental trajectories of Body Mass Index from infancy to 18 years of age:

prenatal determinants and health consequences. *J Epidemiol Community Health* 2014;68:934–41.

E12. Stuart B, Panico L. Early-childhood BMI trajectories: evidence from a prospective, nationally representative British cohort study. *Nutr Diabetes* 2016;6:e198.

E13. Chen TA, Baranowski T, Moreno JP, O'Connor TM, Hughes SO, Baranowski J, Woehler D, Kimbro RT, Johnston CA, Abrams P, Katz LL, Klein S, Burke L, Bray G, Blair S, Allison D, Pi-Sunyer X, Steinberger J, Daniels S, Craig L, Love J, Ratcliffe B, McNeill G, Ogden C, Carroll M, Flegal K, Fiorino E, Brooks L, Dietz W, et al. Obesity status trajectory groups among elementary school children. *BMC Public Health* 2016;16:526.

E14. Reinders I, Murphy RA, Martin KR, Brouwer IA, Visser M, White DK, Newman AB, Houston DK, Kanaya AM, Nagin DS, Harris TB. Body mass index trajectories in relation to change in lean mass and physical function: The Health, Aging and Body Composition Study. *J Am Geriatr Soc* 2015;63:1615–1621.

E15. Zheng H, Tumin D, Qian Z. Obesity and mortality risk: New findings from body mass index trajectories. *Am J Epidemiol* 2013;178:1591–1599.

E16. Lisan Q, Tafflet M, Charles M-A, Thomas F, Boutouyrie P, Guibout C, Haba-Rubio J, Périer MC, Pannier B, Marques-Vidal P, Jouven X, Empana J-P. Self-reported body silhouette trajectories across the lifespan and excessive daytime sleepiness in adulthood: a retrospective analysis. The Paris Prospective Study III. *BMJ Open* 2018;8:e020851.

E17. Andruff H, Carraro N, Thompson A, Gaudreau P, Louvet B. Latent Class Growth Modelling: A Tutorial. *Tutor Quant Methods Psychol* 2009;5:11–24.

E18. World Health Organization. WHO | BMI-for-age (5-19 years) [Internet]. WHO 2015 [cited 2017 Oct 10]. Available at <[http://www.who.int/growthref/who2007\\_bmi\\_for\\_age/en/](http://www.who.int/growthref/who2007_bmi_for_age/en/)>.

E19. Weber DR, Moore RH, Leonard MB, Zemel BS. Fat and lean BMI reference curves in children and adolescents and their utility in identifying excess adiposity compared with BMI and percentage body fat. *Am J Clin Nutr* 2013;98:49–56.

E20. Quanjer PH, Stanojevic S, Cole TJ, Baur X, Hall GL, Culver BH, Enright PL, Hankinson JL, Ip MSM, Zheng J, Stocks J, Schindler C. Multi-ethnic reference values for spirometry for the 3-95-yr age range: The global lung function 2012 equations. *Eur Respir J* 2012;40:1324–1343.
